# Supplementary material for: The interaction of diet, alcohol, genetic predisposition, and the risk of breast cancer: a cohort study from the UK Biobank
Source: PubMed Central journal article supplement (PMC10899287; doi:10.1007/s00394-023-03269-8), 2023-11-01
Supplement: 394_2023_3269_MOESM1_ESM.pdf [file 394_2023_3269_MOESM1_ESM.pdf]

Supplementary Table 1: Detailed information of single nucleotide polymorphisms (SNPs) used for constructing the polygenic risk score (PRS) for breast cancer

| SNP <sup>a</sup>     | Chr | Position <sup>b</sup> | Reference Allele | Effect Allele | EAF <sup>c</sup> | beta    |             | Missing SNPs |
|----------------------|-----|-----------------------|------------------|---------------|------------------|---------|-------------|--------------|
|                      |     |                       |                  |               |                  | Over BC | ER-positive |              |
| 1_100880328_A_T      | 1   | 100880328             | A                | T             | 0.4097           | 0.0373  | 0.0373      | 0.0373       |
| 1_10566215_A_G       | 1   | 10566215              | A                | G             | 0.3290           | -0.0586 | -0.0407     | -0.1109      |
| 1_110198129_CAAA     | 1   | 110198129             | CAAA             | C             | 0.7755           | 0.0458  | 0.0458      | 0.0458       |
| 1_114445880_G_A      | 1   | 114445880             | G                | A             | 0.1664           | 0.0621  | 0.0621      | 0.0621       |
| 1_118141492_A_C      | 1   | 118141492             | A                | C             | 0.2657           | 0.0452  | 0.0452      | 0.0452       |
| 1_120257110_T_C      | 1   | 120257110             | T                | C             | 0.5309           | 0.0385  | 0.0430      | 0.0226       |
| 1_121280613_A_G      | 1   | 121280613             | A                | G             | 0.4053           | 0.0881  | 0.1052      | 0.0209       |
| 1_121287994_A_G      | 1   | 121287994             | A                | G             | 0.1060           | -0.0673 | -0.0814     | -0.0114      |
| 1_145604302_C_CT     | 1   | 145604302             | C                | CT            | 0.3515           | -0.0399 | -0.0469     | -0.0126      |
| 1_149906413_T_C      | 1   | 149906413             | T                | C             | 0.4017           | 0.0548  | 0.0548      | 0.0548       |
| 1_155556971_G_A      | 1   | 155556971             | G                | A             | 0.2302           | 0.0499  | 0.0499      | 0.0499       |
| 1_168171052_CA_C     | 1   | 168171052             | CA               | C             | 0.1097           | -0.0680 | -0.0680     | -0.0680      |
| 1_172328767_T_TA     | 1   | 172328767             | T                | TA            | 0.3305           | -0.0435 | -0.0435     | -0.0435      |
| 1_18807339_T_C       | 1   | 18807339              | T                | C             | 0.5145           | -0.0564 | -0.0649     | -0.0248      |
| 1_201437832_C_T      | 1   | 201437832             | C                | T             | 0.0559           | 0.0917  | 0.0917      | 0.0917       |
| 1_202184600_C_T      | 1   | 202184600             | C                | T             | 0.3992           | -0.0065 | 0.0133      | -0.0822      |
| 1_203770448_T_A      | 1   | 203770448             | T                | A             | 0.2715           | 0.0498  | 0.0498      | 0.0498       |
| 1_204502514_T_TTCTG/ | 1   | 204502514             | T                | TTCTG/        | 0.8028           | -0.0321 | -0.0024     | -0.1345      |
| 1_208076291_G_A      | 1   | 208076291             | G                | A             | 0.3337           | -0.0366 | -0.0366     | -0.0366      |
| 1_217053815_T_G      | 1   | 217053815             | T                | G             | 0.3280           | 0.0417  | 0.0417      | 0.0417       |
| 1_217220574_G_A      | 1   | 217220574             | G                | A             | 0.2107           | -0.0440 | -0.0459     | 0.0029       |
| 1_220671050_C_T      | 1   | 220671050             | C                | T             | 0.2415           | 0.0418  | 0.0418      | 0.0418       |
| 1_242034263_A_G      | 1   | 242034263             | A                | G             | 0.0305           | 0.1428  | 0.1428      | 0.1428       |
| 1_41380440_C_T       | 1   | 41380440              | C                | T             | 0.6438           | 0.0426  | 0.0426      | 0.0426       |
| 1_41389220_T_C       | 1   | 41389220              | T                | C             | 0.0169           | 0.1550  | 0.1550      | 0.1550       |
| 1_46670206_TC_T      | 1   | 46670206              | TC               | T             | 0.2973           | 0.0447  | 0.0595      | 0.0216       |
| 1_51467096_CT_C      | 1   | 51467096              | CT               | C             | 0.4800           | 0.0374  | 0.0374      | 0.0374       |
| 1_7917076_G_A        | 1   | 7917076               | G                | A             | 0.3899           | -0.0409 | -0.0409     | -0.0409      |
| 1_88156923_G_A       | 1   | 88156923              | G                | A             | 0.1487           | 0.0494  | 0.0580      | 0.0183       |
| 1_88428199_C_A       | 1   | 88428199              | C                | A             | 0.2477           | -0.0387 | -0.0387     | -0.0387      |
| 2_10138983_T_C       | 2   | 10138983              | T                | C             | 0.1160           | 0.0603  | 0.0603      | 0.0603       |
| 2_121058254_A_G      | 2   | 121058254             | A                | G             | 0.7047           | -0.0334 | -0.0232     | -0.0682      |
| 2_121089731_T_C      | 2   | 121089731             | T                | C             | 0.1943           | -0.0427 | -0.0290     | -0.1027      |
| 2_121159205_G_A      | 2   | 121159205             | G                | A             | 0.3527           | -0.0440 | -0.0440     | -0.0440      |
| 2_121246568_T_C      | 2   | 121246568             | T                | C             | 0.8970           | 0.0992  | 0.0992      | 0.0992       |
| 2_172974566_C_G      | 2   | 172974566             | C                | G             | 0.4743           | -0.0473 | -0.0611     | -0.0061      |
| 2_174212910_A_G      | 2   | 174212910             | A                | G             | 0.8450           | 0.0593  | 0.0621      | 0.0175       |
| 2_192381934_C_T      | 2   | 192381934             | C                | T             | 0.8588           | 0.0316  | 0.0180      | 0.1012       |
| 2_19315675_T_A       | 2   | 19315675              | T                | A             | 0.5599           | -0.0331 | -0.0229     | -0.0570      |
| 2_202204741_T_C      | 2   | 202204741             | T                | C             | 0.7210           | -0.0492 | -0.0492     | -0.0492      |
| 2_217920769_G_T      | 2   | 217920769             | G                | T             | 0.5001           | -0.1318 | -0.1532     | -0.0589      |
| 2_217955896_GA_G     | 2   | 217955896             | GA               | G             | 0.0382           | -0.2016 | -0.2362     | -0.0558      |
| 2_218292158_C_G      | 2   | 218292158             | C                | G             | 0.7309           | -0.0757 | -0.0757     | -0.0757      |
| 2_218714845_G_A      | 2   | 218714845             | G                | A             | 0.3917           | -0.0431 | -0.0463     | -0.0184      |
| 2_241388857_C_A      | 2   | 241388857             | C                | A             | 0.9772           | -0.1232 | -0.1232     | -0.1232      |
| 2_25129473_A_G       | 2   | 25129473              | A                | G             | 0.4082           | -0.0427 | -0.0427     | -0.0427      |
| 2_29179452_G_C       | 2   | 29179452              | G                | C             | 0.2287           | -0.0066 | 0.0207      | -0.1006      |

|                   |   |                   |     |        |         |         |         |         |
|-------------------|---|-------------------|-----|--------|---------|---------|---------|---------|
| 2_29615233_T_C    | 2 | 29615233 T        | C   | 0.2622 | -0.0427 | -0.0427 | -0.0427 |         |
| 2_39699510_C_CT   | 2 | 39699510 C        | CT  | 0.4659 | -0.0402 | -0.0402 | -0.0402 |         |
| 2_70172587_G_A    | 2 | 70172587 G        | A   | 0.2787 | -0.0412 | -0.0412 | -0.0412 |         |
| 2_88358825_G_C    | 2 | 88358825 G        | C   | 0.3081 | 0.0473  | 0.0473  | 0.0473  |         |
| 3_141112859_CTT_C | 3 | 141112859 CTT     | C   | 0.4149 | 0.0551  | 0.0551  | 0.0551  |         |
| 3_172285237_G_A   | 3 | 172285237 G       | A   | 0.2131 | 0.0422  | 0.0501  | -0.0133 |         |
| 3_189774456_C_T   | 3 | 189774456 C       | T   | 0.2235 | -0.0478 | -0.0478 | -0.0478 |         |
| 3_27353716_C_A    | 3 | 27353716 C        | A   | 0.5259 | 0.0748  | 0.0822  | 0.0310  |         |
| 3_27388664_C_G    | 3 | 27388664 C        | G   | 0.2735 | 0.0502  | 0.0502  | 0.0502  |         |
| 3_29294845_C_T    | 3 | 29294845 C        | T   | 0.0163 | -0.1281 | -0.1221 | -0.2988 |         |
| 3_30684907_C_T    | 3 | 30684907 C        | T   | 0.2975 | 0.0592  | 0.0657  | 0.0170  |         |
| 3_46888198_T_C    | 3 | 46888198 T        | C   | 0.1032 | -0.0806 | -0.0806 | -0.0806 |         |
| 3_4742251_A_G     | 3 | 4742251 A         | G   | 0.3802 | 0.0616  | 0.0616  | 0.0616  |         |
| 3_49709912_C_CT   | 3 | 49709912 C        | CT  | 0.2873 | -0.0367 | -0.0355 | -0.0721 |         |
| 3_55970777_A_AT   | 3 | 55970777 A        | AT  | 0.0305 | -0.1195 | -0.1195 | -0.1195 |         |
| 3_59373745_C_T    | 3 | 59373745 C        | T   | 0.4294 | -0.0394 | -0.0394 | -0.0394 |         |
| 3_63887449_T_TTG  | 3 | 63887449 T        | TTG | 0.1297 | 0.0648  | 0.0648  | 0.0648  | missing |
| 3_71620370_T_G    | 3 | 71620370 T        | G   | 0.6382 | -0.0374 | -0.0374 | -0.0374 |         |
| 3_87037543_A_G    | 3 | 87037543 A        | G   | 0.0921 | -0.0723 | -0.0723 | -0.0723 |         |
| 3_99403877_G_A    | 3 | 99403877 G        | A   | 0.4852 | -0.0376 | -0.0376 | -0.0376 |         |
| 4_106069013_G_T   | 4 | 106069013 G       | T   | 0.2289 | 0.0471  | 0.0594  | 0.0097  |         |
| 4_126752992_A_AA  | 4 | 126752992 A       | AAT | 0.5167 | -0.0377 | -0.0377 | -0.0377 | missing |
| 4_143467195_C_T   | 4 | 143467195 C       | T   | 0.1115 | -0.0569 | -0.0569 | -0.0569 |         |
| 4_151218296_CATA  | 4 | 151218296 CATATTT | C   | 0.6533 | 0.0388  | 0.0388  | 0.0388  |         |
| 4_175842495_G_A   | 4 | 175842495 G       | A   | 0.1161 | -0.0898 | -0.1162 | 0.0199  |         |
| 4_175847436_C_A   | 4 | 175847436 C       | A   | 0.3433 | 0.0348  | 0.0537  | -0.0099 |         |
| 4_187503758_A_T   | 4 | 187503758 A       | T   | 0.4471 | 0.0357  | 0.0357  | 0.0357  | missing |
| 4_38784633_G_T    | 4 | 38784633 G        | T   | 0.2493 | 0.0489  | 0.0489  | 0.0489  |         |
| 4_84370124_TAA_T  | 4 | 84370124 TAA      | TA  | 0.5324 | -0.0464 | -0.0464 | -0.0464 |         |
| 4_89240476_G_A    | 4 | 89240476 G        | A   | 0.4395 | 0.0352  | 0.0352  | 0.0352  |         |
| 4_92594859_TTCTTT | 4 | 92594859 TTCTTTC  | T   | 0.4445 | -0.0407 | -0.0407 | -0.0407 |         |
| 5_104300273_G_T   | 5 | 104300273 G       | T   | 0.1810 | -0.0487 | -0.0487 | -0.0487 |         |
| 5_122478676_C_A   | 5 | 122478676 C       | A   | 0.7448 | -0.0386 | -0.0386 | -0.0386 |         |
| 5_122705244_C_T   | 5 | 122705244 C       | T   | 0.0306 | 0.0944  | 0.0944  | 0.0944  |         |
| 5_1279790_C_T     | 5 | 1279790 C         | T   | 0.2592 | 0.0617  | 0.0325  | 0.1502  |         |
| 5_1296255_A_AG    | 5 | 1296255 A         | AG  | 0.3072 | -0.0549 | -0.0417 | -0.1056 |         |
| 5_131640536_A_G   | 5 | 131640536 A       | G   | 0.5427 | 0.0392  | 0.0467  | 0.0099  |         |
| 5_132407058_C_T   | 5 | 132407058 C       | T   | 0.2450 | -0.0388 | -0.0561 | -0.0214 |         |
| 5_1353077_T_C     | 5 | 1353077 T         | C   | 0.0121 | 0.1552  | 0.1552  | 0.1552  |         |
| 5_158244083_C_T   | 5 | 158244083 C       | T   | 0.5683 | -0.0677 | -0.0677 | -0.0677 |         |
| 5_16231194_G_C    | 5 | 16231194 G        | C   | 0.5594 | -0.0426 | -0.0426 | -0.0426 |         |
| 5_169591460_T_C   | 5 | 169591460 T       | C   | 0.3345 | 0.0412  | 0.0501  | 0.0182  |         |
| 5_173358154_G_A   | 5 | 173358154 G       | A   | 0.4074 | 0.0365  | 0.0365  | 0.0365  |         |
| 5_176134882_T_C   | 5 | 176134882 T       | C   | 0.5422 | 0.0363  | 0.0363  | 0.0363  |         |
| 5_2777029_G_A     | 5 | 2777029 G         | A   | 0.4139 | 0.0391  | 0.0391  | 0.0391  |         |
| 5_32579616_TCA_T  | 5 | 32579616 TCA      | T   | 0.4844 | 0.0363  | 0.0363  | 0.0363  |         |
| 5_345109_T_C      | 5 | 345109 T          | C   | 0.0544 | 0.0840  | 0.0840  | 0.0840  | missing |
| 5_44508264_G_GT   | 5 | 44508264 G        | GT  | 0.1265 | -0.1177 | -0.1177 | -0.1177 |         |
| 5_44619502_A_G    | 5 | 44619502 A        | G   | 0.1549 | -0.1101 | -0.1101 | -0.1101 |         |
| 5_44649944_C_T    | 5 | 44649944 C        | T   | 0.6010 | 0.0492  | 0.0713  | -0.0261 |         |
| 5_44706498_A_G    | 5 | 44706498 A        | G   | 0.2481 | 0.0497  | 0.0648  | -0.0256 |         |
| 5_44853593_G_C    | 5 | 44853593 G        | C   | 0.3081 | -0.0336 | -0.0222 | -0.0778 |         |

|                  |   |                  |     |        |         |         |         |         |
|------------------|---|------------------|-----|--------|---------|---------|---------|---------|
| 5_52679539_C_CA  | 5 | 52679539 C       | CA  | 0.0998 | 0.0571  | 0.0571  | 0.0571  | missing |
| 5_55662540_C_CT  | 5 | 55662540 C       | CT  | 0.3631 | -0.0458 | -0.0458 | -0.0458 |         |
| 5_55965167_C_T   | 5 | 55965167 C       | T   | 0.5576 | 0.0394  | 0.0394  | 0.0394  |         |
| 5_56023083_T_G   | 5 | 56023083 T       | G   | 0.1583 | 0.1366  | 0.1612  | 0.0686  |         |
| 5_56042972_C_T   | 5 | 56042972 C       | T   | 0.0521 | 0.0865  | 0.1082  | 0.0058  |         |
| 5_56045081_T_C   | 5 | 56045081 T       | C   | 0.1655 | -0.0564 | -0.0643 | -0.0168 |         |
| 5_58241712_C_T   | 5 | 58241712 C       | T   | 0.5750 | -0.0434 | -0.0434 | -0.0434 |         |
| 5_71965007_G_A   | 5 | 71965007 G       | A   | 0.2572 | -0.0410 | -0.0410 | -0.0410 |         |
| 5_73234583_T_C   | 5 | 73234583 T       | C   | 0.3213 | -0.0363 | -0.0494 | -0.0101 |         |
| 5_77155397_GT_G  | 5 | 77155397 GT      | G   | 0.3466 | -0.0408 | -0.0408 | -0.0408 | missing |
| 5_79180995_G_GA  | 5 | 79180995 G       | GA  | 0.1755 | 0.0328  | 0.0248  | 0.0804  |         |
| 5_81512947_TA_T  | 5 | 81512947 TA      | T   | 0.2503 | -0.0598 | -0.0731 | -0.0342 |         |
| 5_90789470_G_A   | 5 | 90789470 G       | A   | 0.1580 | -0.0564 | -0.0714 | -0.0031 |         |
| 6_130341728_C_CT | 6 | 130341728 C      | CT  | 0.7116 | 0.0472  | 0.0472  | 0.0472  |         |
| 6_13713366_G_C   | 6 | 13713366 G       | C   | 0.5691 | -0.0553 | -0.0623 | -0.0152 |         |
| 6_149595505_T_C  | 6 | 149595505 T      | C   | 0.2061 | -0.0476 | -0.0476 | -0.0476 |         |
| 6_151949806_A_C  | 6 | 151949806 A      | C   | 0.3083 | 0.0703  | 0.0541  | 0.1103  |         |
| 6_151955914_A_G  | 6 | 151955914 A      | G   | 0.0713 | 0.1449  | 0.1150  | 0.2240  |         |
| 6_152022664_CAAA | 6 | 152022664 CAAAAA | C   | 0.6119 | 0.0137  | 0.0137  | 0.0137  |         |
| 6_152023191_G_A  | 6 | 152023191 G      | A   | 0.3965 | 0.0626  | 0.0509  | 0.1008  |         |
| 6_152055978_A_T  | 6 | 152055978 A      | T   | 0.0627 | 0.0740  | 0.0740  | 0.0740  |         |
| 6_152432902_C_T  | 6 | 152432902 C      | T   | 0.5146 | 0.0649  | 0.0527  | 0.0965  |         |
| 6_16399557_C_T   | 6 | 16399557 C       | T   | 0.3299 | -0.0373 | -0.0373 | -0.0373 |         |
| 6_169006947_C_G  | 6 | 169006947 C      | G   | 0.5202 | -0.0308 | -0.0252 | -0.0628 |         |
| 6_170332621_T_C  | 6 | 170332621 T      | C   | 0.6158 | 0.0373  | 0.0373  | 0.0373  |         |
| 6_18783140_G_A   | 6 | 18783140 G       | A   | 0.6200 | 0.0326  | 0.0478  | 0.0033  |         |
| 6_20537845_CA_C  | 6 | 20537845 CA      | C   | 0.4733 | -0.0391 | -0.0391 | -0.0391 |         |
| 6_21923810_T_C   | 6 | 21923810 T       | C   | 0.4303 | -0.0321 | -0.0438 | -0.0032 |         |
| 6_27425644_G_C   | 6 | 27425644 G       | C   | 0.0815 | -0.0737 | -0.0737 | -0.0737 |         |
| 6_43227141_G_A   | 6 | 43227141 G       | A   | 0.0985 | -0.0640 | -0.0640 | -0.0640 |         |
| 6_82263549_AAT_A | 6 | 82263549 AAT     | A   | 0.4262 | 0.0477  | 0.0477  | 0.0477  |         |
| 6_85912194_CAA_C | 6 | 85912194 CAA     | C   | 0.0604 | 0.0762  | 0.0762  | 0.0762  |         |
| 6_87803819_T_C   | 6 | 87803819 T       | C   | 0.2770 | 0.0383  | 0.0318  | 0.0678  |         |
| 7_101552440_G_A  | 7 | 101552440 G      | A   | 0.1255 | -0.0568 | -0.0568 | -0.0568 |         |
| 7_102481842_T_C  | 7 | 102481842 T      | C   | 0.3416 | 0.0418  | 0.0418  | 0.0418  |         |
| 7_130656911_C_T  | 7 | 130656911 C      | T   | 0.3734 | -0.0476 | -0.0476 | -0.0476 |         |
| 7_130674481_G_A  | 7 | 130674481 G      | A   | 0.2971 | 0.0416  | 0.0416  | 0.0416  |         |
| 7_139943702_CT_C | 7 | 139943702 CT     | C   | 0.5381 | 0.0582  | 0.0666  | 0.0057  |         |
| 7_144048902_G_T  | 7 | 144048902 G      | T   | 0.2284 | -0.0563 | -0.0592 | -0.0148 |         |
| 7_21940960_A_G   | 7 | 21940960 A       | G   | 0.3515 | -0.0467 | -0.0467 | -0.0467 |         |
| 7_25569548_C_T   | 7 | 25569548 C       | T   | 0.1667 | -0.0486 | -0.0486 | -0.0486 |         |
| 7_28869017_G_A   | 7 | 28869017 G       | A   | 0.1072 | -0.0572 | -0.0572 | -0.0572 |         |
| 7_55192256_A_C   | 7 | 55192256 A       | C   | 0.5497 | -0.0349 | -0.0349 | -0.0349 |         |
| 7_91459189_A_ATT | 7 | 91459189 A       | ATT | 0.3286 | 0.0452  | 0.0452  | 0.0452  | missing |
| 7_94113799_T_C   | 7 | 94113799 T       | C   | 0.2792 | 0.0449  | 0.0449  | 0.0449  |         |
| 7_98005235_G_A   | 7 | 98005235 G       | A   | 0.1627 | -0.0467 | -0.0467 | -0.0467 |         |
| 7_99948655_T_G   | 7 | 99948655 T       | G   | 0.2109 | 0.0420  | 0.0420  | 0.0420  |         |
| 8_102483100_T_C  | 8 | 102483100 T      | C   | 0.0967 | 0.0593  | 0.0736  | 0.0137  |         |
| 8_106358620_A_T  | 8 | 106358620 A      | T   | 0.1003 | -0.0745 | -0.0895 | -0.0100 |         |
| 8_117209548_A_G  | 8 | 117209548 A      | G   | 0.6445 | -0.0417 | -0.0417 | -0.0417 |         |
| 8_120862186_A_G  | 8 | 120862186 A      | G   | 0.1318 | 0.0527  | 0.0527  | 0.0527  |         |
| 8_124563705_T_C  | 8 | 124563705 T      | C   | 0.1458 | 0.0477  | 0.0477  | 0.0477  |         |

|                  |    |                |    |        |         |         |         |
|------------------|----|----------------|----|--------|---------|---------|---------|
| 8_124571581_G_A  | 8  | 124571581 G    | A  | 0.4173 | 0.0340  | 0.0340  | 0.0340  |
| 8_124739913_T_G  | 8  | 124739913 T    | G  | 0.3985 | 0.0466  | 0.0466  | 0.0466  |
| 8_128213561_C_CA | 8  | 128213561 C    | CA | 0.4153 | -0.0430 | -0.0430 | -0.0430 |
| 8_128370949_C_G  | 8  | 128370949 C    | G  | 0.4020 | 0.0642  | 0.0820  | 0.0076  |
| 8_128372172_A_G  | 8  | 128372172 A    | G  | 0.5446 | 0.0597  | 0.0597  | 0.0597  |
| 8_129199566_G_A  | 8  | 129199566 G    | A  | 0.1717 | 0.0615  | 0.0615  | 0.0615  |
| 8_143669254_A_G  | 8  | 143669254 A    | G  | 0.3390 | -0.0346 | -0.0346 | -0.0346 |
| 8_170692_T_C     | 8  | 170692 T       | C  | 0.2227 | 0.0477  | 0.0348  | 0.1040  |
| 8_17787610_CT_C  | 8  | 17787610 CT    | C  | 0.6230 | -0.0377 | -0.0377 | -0.0377 |
| 8_23447496_A_G   | 8  | 23447496 A     | G  | 0.6487 | -0.0389 | -0.0389 | -0.0389 |
| 8_23663653_C_A   | 8  | 23663653 C     | A  | 0.4032 | 0.0335  | 0.0451  | 0.0059  |
| 8_29509616_A_C   | 8  | 29509616 A     | C  | 0.6756 | -0.0601 | -0.0601 | -0.0601 |
| 8_36858483_A_G   | 8  | 36858483 A     | G  | 0.1820 | -0.0760 | -0.0760 | -0.0760 |
| 8_76230943_A_G   | 8  | 76230943 A     | G  | 0.8282 | 0.0755  | 0.0755  | 0.0755  |
| 8_76333056_C_T   | 8  | 76333056 C     | T  | 0.0878 | 0.1129  | 0.1129  | 0.1129  |
| 8_76378165_G_T   | 8  | 76378165 G     | T  | 0.3595 | -0.0391 | -0.0391 | -0.0391 |
| 9_110303808_TAA_ | 9  | 110303808 TAA  | T  | 0.2065 | 0.0797  | 0.1007  | 0.0130  |
| 9_110837073_A_G  | 9  | 110837073 A    | G  | 0.0630 | 0.1158  | 0.1315  | 0.0289  |
| 9_110837176_C_T  | 9  | 110837176 C    | T  | 0.1750 | 0.0653  | 0.0809  | -0.0037 |
| 9_110849525_G_T  | 9  | 110849525 G    | T  | 0.5977 | 0.0153  | 0.0153  | 0.0153  |
| 9_110885479_C_T  | 9  | 110885479 C    | T  | 0.6222 | 0.0877  | 0.1110  | 0.0019  |
| 9_119313486_A_G  | 9  | 119313486 A    | G  | 0.4087 | -0.0462 | -0.0462 | -0.0462 |
| 9_129424719_A_G  | 9  | 129424719 A    | G  | 0.4577 | -0.0382 | -0.0382 | -0.0382 |
| 9_136146597_C_T  | 9  | 136146597 C    | T  | 0.2727 | 0.0400  | 0.0400  | 0.0400  |
| 9_21964882_CAAAA | 9  | 21964882 CAAAA | C  | 0.3184 | 0.0550  | 0.0550  | 0.0550  |
| 9_22041998_C_G   | 9  | 22041998 C     | G  | 0.1393 | 0.0289  | 0.0168  | 0.0906  |
| 9_36928288_T_C   | 9  | 36928288 T     | C  | 0.5349 | 0.0249  | 0.0249  | 0.0249  |
| 9_6880263_A_G    | 9  | 6880263 A      | G  | 0.2855 | 0.0348  | 0.0499  | -0.0078 |
| 9_87782211_T_C   | 9  | 87782211 T     | C  | 0.5094 | 0.0361  | 0.0361  | 0.0361  |
| 9_98362587_T_C   | 9  | 98362587 T     | C  | 0.0940 | 0.0576  | 0.0576  | 0.0576  |
| 10_114777670_C_T | 10 | 114777670 C    | T  | 0.4631 | 0.0472  | 0.0472  | 0.0472  |
| 10_115128491_T_C | 10 | 115128491 T    | C  | 0.7846 | -0.0592 | -0.0592 | -0.0592 |
| 10_123095209_G_A | 10 | 123095209 G    | A  | 0.3269 | -0.0538 | -0.0702 | 0.0048  |
| 10_123340107_A_G | 10 | 123340107 A    | G  | 0.0656 | 0.1508  | 0.1837  | 0.0053  |
| 10_123340431_GC_ | 10 | 123340431 GC   | G  | 0.5963 | -0.2408 | -0.2913 | -0.0326 |
| 10_123349324_A_T | 10 | 123349324 A    | T  | 0.0484 | -0.2609 | -0.3270 | -0.0137 |
| 10_13892298_G_A  | 10 | 13892298 G     | A  | 0.4376 | 0.0371  | 0.0371  | 0.0371  |
| 10_22032942_A_G  | 10 | 22032942 A     | G  | 0.7085 | -0.0580 | -0.0719 | 0.0344  |
| 10_22477776_ACC_ | 10 | 22477776 ACC   | A  | 0.0202 | 0.1687  | 0.1687  | 0.1687  |
| 10_22861490_A_C  | 10 | 22861490 A     | C  | 0.9370 | 0.0875  | 0.0960  | 0.0201  |
| 10_38523626_C_A  | 10 | 38523626 C     | A  | 0.3698 | 0.0404  | 0.0404  | 0.0404  |
| 10_5794652_A_G   | 10 | 5794652 A      | G  | 0.2137 | 0.0470  | 0.0470  | 0.0470  |
| 10_64299890_A_G  | 10 | 64299890 A     | G  | 0.1603 | -0.1345 | -0.1428 | -0.1030 |
| 10_64819996_G_T  | 10 | 64819996 G     | T  | 0.1958 | 0.0472  | 0.0472  | 0.0472  |
| 10_71335574_C_T  | 10 | 71335574 C     | T  | 0.3179 | -0.0404 | -0.0404 | -0.0404 |
| 10_80851257_G_T  | 10 | 80851257 G     | T  | 0.6172 | -0.0805 | -0.0898 | -0.0443 |
| 10_80886726_A_G  | 10 | 80886726 A     | G  | 0.1631 | 0.0762  | 0.0762  | 0.0762  |
| 10_95292187_CAA_ | 10 | 95292187 CAA   | C  | 0.8234 | -0.0512 | -0.0512 | -0.0512 |
| 11_103614438_T_G | 11 | 103614438 T    | G  | 0.6572 | 0.0147  | 0.0029  | 0.0676  |
| 11_108267402_C_C | 11 | 108267402 C    | CA | 0.4173 | -0.0022 | 0.0141  | -0.0629 |
| 11_111696440_T_C | 11 | 111696440 T    | C  | 0.6221 | -0.0396 | -0.0396 | -0.0396 |
| 11_116727936_A_T | 11 | 116727936 A    | T  | 0.2046 | -0.0423 | -0.0423 | -0.0423 |

|                  |    |           |    |    |        |         |         |         |
|------------------|----|-----------|----|----|--------|---------|---------|---------|
| 11_122966626_A_G | 11 | 122966626 | A  | G  | 0.2922 | -0.0383 | -0.0383 | -0.0383 |
| 11_129243417_T_G | 11 | 129243417 | T  | G  | 0.8620 | -0.0543 | -0.0543 | -0.0543 |
| 11_129461016_A_G | 11 | 129461016 | A  | G  | 0.6016 | 0.0453  | 0.0453  | 0.0453  |
| 11_18664241_T_G  | 11 | 18664241  | T  | G  | 0.7293 | 0.0461  | 0.0461  | 0.0461  |
| 11_1895708_C_A   | 11 | 1895708   | C  | A  | 0.3924 | -0.0762 | -0.0762 | -0.0762 |
| 11_42844441_C_T  | 11 | 42844441  | C  | T  | 0.3279 | -0.0336 | -0.0336 | -0.0336 |
| 11_433617_T_C    | 11 | 433617    | T  | C  | 0.7969 | -0.0437 | -0.0437 | -0.0437 |
| 11_44368892_G_A  | 11 | 44368892  | G  | A  | 0.5495 | 0.0374  | 0.0374  | 0.0374  |
| 11_46318032_C_G  | 11 | 46318032  | C  | G  | 0.0659 | -0.0748 | -0.0748 | -0.0748 |
| 11_65553492_C_A  | 11 | 65553492  | C  | A  | 0.1867 | 0.0425  | 0.0425  | 0.0425  |
| 11_65572431_G_A  | 11 | 65572431  | G  | A  | 0.4886 | -0.0347 | -0.0448 | -0.0067 |
| 11_69328130_A_T  | 11 | 69328130  | A  | T  | 0.2130 | -0.0423 | -0.0538 | 0.0143  |
| 11_69330983_G_A  | 11 | 69330983  | G  | A  | 0.1250 | 0.1022  | 0.1240  | 0.0174  |
| 11_69331418_C_T  | 11 | 69331418  | C  | T  | 0.0753 | 0.1782  | 0.2018  | 0.0066  |
| 11_803017_A_G    | 11 | 803017    | A  | G  | 0.5167 | 0.0457  | 0.0457  | 0.0457  |
| 12_103097887_C_T | 12 | 103097887 | C  | T  | 0.1175 | 0.0546  | 0.0611  | 0.0149  |
| 12_111600134_G_T | 12 | 111600134 | G  | T  | 0.3715 | -0.0442 | -0.0442 | -0.0442 |
| 12_115108136_T_C | 12 | 115108136 | T  | C  | 0.2615 | 0.0465  | 0.0465  | 0.0465  |
| 12_115796577_A_G | 12 | 115796577 | A  | G  | 0.1959 | -0.0428 | -0.0643 | -0.0148 |
| 12_115835836_T_C | 12 | 115835836 | T  | C  | 0.4171 | -0.0813 | -0.0977 | -0.0153 |
| 12_120832146_C_T | 12 | 120832146 | C  | T  | 0.1593 | 0.0516  | 0.0516  | 0.0516  |
| 12_14413931_G_C  | 12 | 14413931  | G  | C  | 0.2619 | 0.0484  | 0.0484  | 0.0484  |
| 12_28149568_C_T  | 12 | 28149568  | C  | T  | 0.1170 | -0.0620 | -0.0620 | -0.0620 |
| 12_28174817_C_T  | 12 | 28174817  | C  | T  | 0.2421 | -0.0856 | -0.0856 | -0.0856 |
| 12_28347382_C_T  | 12 | 28347382  | C  | T  | 0.2153 | -0.0521 | -0.0521 | -0.0521 |
| 12_29140260_G_A  | 12 | 29140260  | G  | A  | 0.9126 | 0.0647  | 0.0647  | 0.0647  |
| 12_293626_A_G    | 12 | 293626    | A  | G  | 0.3711 | 0.0401  | 0.0401  | 0.0401  |
| 12_57146069_T_G  | 12 | 57146069  | T  | G  | 0.1037 | -0.0579 | -0.0579 | -0.0579 |
| 12_70798355_A_T  | 12 | 70798355  | A  | T  | 0.1810 | 0.0469  | 0.0469  | 0.0469  |
| 12_83064195_G_GA | 12 | 83064195  | G  | GA | 0.0992 | 0.0671  | 0.0671  | 0.0671  |
| 12_85004551_C_T  | 12 | 85004551  | C  | T  | 0.4955 | 0.0348  | 0.0348  | 0.0348  |
| 12_96027759_A_G  | 12 | 96027759  | A  | G  | 0.2963 | -0.0867 | -0.0867 | -0.0867 |
| 13_32839990_G_A  | 13 | 32839990  | G  | A  | 0.0174 | 0.0424  | 0.0424  | 0.0424  |
| 13_32972626_A_T  | 13 | 32972626  | A  | T  | 0.0079 | 0.2687  | 0.2308  | 0.4284  |
| 13_43501356_A_G  | 13 | 43501356  | A  | G  | 0.8303 | 0.0517  | 0.0458  | 0.0975  |
| 13_73806982_T_C  | 13 | 73806982  | T  | C  | 0.3153 | 0.0345  | 0.0251  | 0.0653  |
| 13_73960952_A_G  | 13 | 73960952  | A  | G  | 0.7618 | 0.0399  | 0.0368  | 0.0730  |
| 14_105213978_T_G | 14 | 105213978 | T  | G  | 0.4588 | 0.0399  | 0.0399  | 0.0399  |
| 14_37128564_C_A  | 14 | 37128564  | C  | A  | 0.2122 | -0.0733 | -0.0850 | -0.0339 |
| 14_37228504_C_T  | 14 | 37228504  | C  | T  | 0.4434 | 0.0390  | 0.0390  | 0.0390  |
| 14_68660428_T_C  | 14 | 68660428  | T  | C  | 0.8345 | -0.0474 | -0.0612 | 0.0245  |
| 14_68979835_T_C  | 14 | 68979835  | T  | C  | 0.2581 | -0.0911 | -0.0911 | -0.0911 |
| 14_91751788_TC_T | 14 | 91751788  | TC | T  | 0.6934 | 0.0380  | 0.0447  | 0.0091  |
| 14_91841069_A_G  | 14 | 91841069  | A  | G  | 0.3444 | 0.0513  | 0.0513  | 0.0513  |
| 14_93070286_C_T  | 14 | 93070286  | C  | T  | 0.1709 | -0.0577 | -0.0577 | -0.0577 |
| 15_100905819_A_C | 15 | 100905819 | A  | C  | 0.1100 | -0.0608 | -0.0608 | -0.0608 |
| 15_46680811_C_A  | 15 | 46680811  | C  | A  | 0.0115 | -0.1973 | -0.1973 | -0.1973 |
| 15_50694306_A_G  | 15 | 50694306  | A  | G  | 0.3446 | -0.0417 | -0.0417 | -0.0417 |
| 15_66630569_G_A  | 15 | 66630569  | G  | A  | 0.6413 | -0.0369 | -0.0369 | -0.0369 |
| 15_67457698_A_G  | 15 | 67457698  | A  | G  | 0.0496 | 0.0782  | 0.0990  | 0.0141  |
| 15_75750383_T_C  | 15 | 75750383  | T  | C  | 0.2604 | -0.0413 | -0.0413 | -0.0413 |
| 15_91512267_G_T  | 15 | 91512267  | G  | T  | 0.1353 | -0.0589 | -0.0589 | -0.0589 |

|                  |    |          |       |       |        |         |         |         |
|------------------|----|----------|-------|-------|--------|---------|---------|---------|
| 16_10706580_G_A  | 16 | 10706580 | G     | A     | 0.0695 | -0.0740 | -0.0740 | -0.0740 |
| 16_23007047_G_T  | 16 | 23007047 | G     | T     | 0.0236 | 0.1218  | 0.1218  | 0.1218  |
| 16_4008542_CAAA  | 16 | 4008542  | CAAAA | C     | 0.8213 | -0.0329 | -0.0184 | -0.0892 |
| 16_4106788_C_A   | 16 | 4106788  | C     | A     | 0.2643 | -0.0300 | -0.0182 | -0.0782 |
| 16_52538825_C_A  | 16 | 52538825 | C     | A     | 0.2562 | 0.1147  | 0.1147  | 0.1147  |
| 16_52599188_C_T  | 16 | 52599188 | C     | T     | 0.2406 | 0.1070  | 0.1070  | 0.1070  |
| 16_53809123_C_T  | 16 | 53809123 | C     | T     | 0.4201 | -0.0704 | -0.0651 | -0.0957 |
| 16_53861139_C_T  | 16 | 53861139 | C     | T     | 0.7604 | -0.0338 | -0.0167 | -0.0782 |
| 16_53861592_G_A  | 16 | 53861592 | G     | A     | 0.3663 | -0.0337 | -0.0337 | -0.0337 |
| 16_54682064_G_A  | 16 | 54682064 | G     | A     | 0.4850 | 0.0477  | 0.0477  | 0.0477  |
| 16_6963972_C_G   | 16 | 6963972  | C     | G     | 0.7835 | 0.0354  | 0.0303  | 0.0811  |
| 16_80648296_A_G  | 16 | 80648296 | A     | G     | 0.2303 | 0.0839  | 0.0890  | 0.0467  |
| 16_85145977_T_C  | 16 | 85145977 | T     | C     | 0.4856 | -0.0211 | -0.0044 | -0.0714 |
| 16_87086492_T_C  | 16 | 87086492 | T     | C     | 0.2586 | -0.0469 | -0.0469 | -0.0469 |
| 17_29168077_G_T  | 17 | 29168077 | G     | T     | 0.2613 | -0.0568 | -0.0568 | -0.0568 |
| 17_39251123_T_C  | 17 | 39251123 | T     | C     | 0.0682 | 0.0799  | 0.0631  | 0.1431  |
| 17_40127060_T_C  | 17 | 40127060 | T     | C     | 0.0570 | 0.0174  | -0.0161 | 0.1511  |
| 17_40485239_G_T  | 17 | 40485239 | G     | T     | 0.0874 | -0.0571 | -0.0416 | -0.1142 |
| 17_40744470_G_A  | 17 | 40744470 | G     | A     | 0.0124 | 0.2017  | 0.2017  | 0.2017  |
| 17_43212339_C_CT | 17 | 43212339 | C     | CT    | 0.2284 | 0.0438  | 0.0438  | 0.0438  |
| 17_44283858_G_A  | 17 | 44283858 | G     | A     | 0.1895 | -0.0540 | -0.0540 | -0.0540 |
| 17_53209774_A_C  | 17 | 53209774 | A     | C     | 0.3023 | -0.0793 | -0.0933 | -0.0365 |
| 17_77781725_A_G  | 17 | 77781725 | A     | G     | 0.5038 | -0.0401 | -0.0401 | -0.0401 |
| 18_11696613_C_T  | 18 | 11696613 | C     | T     | 0.1379 | -0.0381 | -0.0281 | -0.0940 |
| 18_20634253_C_T  | 18 | 20634253 | C     | T     | 0.6403 | -0.0415 | -0.0415 | -0.0415 |
| 18_24125857_T_C  | 18 | 24125857 | T     | C     | 0.4214 | 0.0346  | 0.0346  | 0.0346  |
| 18_24337424_C_G  | 18 | 24337424 | C     | G     | 0.6205 | 0.0455  | 0.0455  | 0.0455  |
| 18_24518050_AT_A | 18 | 24518050 | AT    | A     | 0.2773 | -0.0599 | -0.0830 | 0.0060  |
| 18_25407513_C_G  | 18 | 25407513 | C     | G     | 0.7126 | 0.0399  | 0.0307  | 0.0648  |
| 18_29981526_G_A  | 18 | 29981526 | G     | A     | 0.0474 | -0.1058 | -0.1058 | -0.1058 |
| 18_42411803_G_C  | 18 | 42411803 | G     | C     | 0.0717 | -0.0877 | -0.1037 | -0.0189 |
| 18_42888797_T_C  | 18 | 42888797 | T     | C     | 0.3519 | -0.0542 | -0.0542 | -0.0542 |
| 19_13249921_G_T  | 19 | 13249921 | G     | T     | 0.0513 | 0.0956  | 0.0956  | 0.0956  |
| 19_17393925_C_A  | 19 | 17393925 | C     | A     | 0.2958 | 0.0378  | 0.0036  | 0.1692  |
| 19_18569492_C_T  | 19 | 18569492 | C     | T     | 0.3481 | -0.0719 | -0.0719 | -0.0719 |
| 19_19517054_C_CG | 19 | 19517054 | C     | CGGGC | 0.3537 | 0.0437  | 0.0437  | 0.0437  |
| 19_44283031_T_C  | 19 | 44283031 | T     | C     | 0.3519 | 0.0619  | 0.0619  | 0.0619  |
| 19_46166073_T_C  | 19 | 46166073 | T     | C     | 0.6074 | -0.0360 | -0.0447 | -0.0117 |
| 19_55816678_C_T  | 19 | 55816678 | C     | T     | 0.3626 | -0.0359 | -0.0359 | -0.0359 |
| 20_11379842_T_C  | 20 | 11379842 | T     | C     | 0.9483 | 0.0844  | 0.0844  | 0.0844  |
| 20_41613706_C_G  | 20 | 41613706 | C     | G     | 0.7928 | 0.0315  | 0.0266  | 0.0784  |
| 20_52296849_G_A  | 20 | 52296849 | G     | A     | 0.2400 | 0.0440  | 0.0539  | 0.0144  |
| 20_5948227_G_A   | 20 | 5948227  | G     | A     | 0.0628 | 0.0760  | 0.0760  | 0.0760  |
| 21_16364756_T_G  | 21 | 16364756 | T     | G     | 0.1732 | 0.0646  | 0.0646  | 0.0646  |
| 21_16566350_A_G  | 21 | 16566350 | A     | G     | 0.0873 | 0.0595  | 0.0678  | 0.0172  |
| 21_16574455_C_A  | 21 | 16574455 | C     | A     | 0.3167 | -0.0707 | -0.0808 | -0.0329 |
| 21_47762932_G_A  | 21 | 47762932 | G     | A     | 0.0355 | 0.0946  | 0.0946  | 0.0946  |
| 22_19766137_C_T  | 22 | 19766137 | C     | T     | 0.3798 | -0.0367 | -0.0367 | -0.0367 |
| 22_29121087_A_G  | 22 | 29121087 | A     | G     | 0.0054 | 0.1839  | 0.2812  | -0.1566 |
| 22_29135543_G_A  | 22 | 29135543 | G     | A     | 0.0870 | 0.0654  | 0.0654  | 0.0654  |
| 22_29203724_C_T  | 22 | 29203724 | C     | T     | 0.0209 | 0.1405  | 0.1793  | 0.0191  |
| 22_29551872_A_G  | 22 | 29551872 | A     | G     | 0.9846 | -0.1716 | -0.1716 | -0.1716 |

|                  |    |          |       |       |        |         |         |         |         |
|------------------|----|----------|-------|-------|--------|---------|---------|---------|---------|
| 22_38583315_AAAA | 22 | 38583315 | AAAAG | AAAAG | 0.2805 | -0.0471 | -0.0608 | 0.0079  | missing |
| 22_39343916_T_A  | 22 | 39343916 | T     | A     | 0.2541 | 0.0407  | 0.0407  | 0.0407  |         |
| 22_40904707_CT_C | 22 | 40904707 | CT    | C     | 0.1099 | 0.1148  | 0.1148  | 0.1148  |         |
| 22_43433100_C_T  | 22 | 43433100 | C     | T     | 0.1144 | -0.0600 | -0.0600 | -0.0600 |         |
| 22_45319953_G_A  | 22 | 45319953 | G     | A     | 0.4166 | -0.0134 | -0.0060 | -0.0611 |         |
| 22_46283297_G_A  | 22 | 46283297 | G     | A     | 0.1117 | 0.0736  | 0.0736  | 0.0736  |         |

<sup>b</sup>Position based on build 37

<sup>c</sup>EAF, Effect Allele frequency estimates for controls in the complete Oncoarray dataset

Taken from: Mavaddat et al. Polygenic Risk Scores for Prediction of Breast Cancer and Breast Cancer Subtypes. Am J Hum Genet. 2019; 104(1): 21-34

Supplementary Table 2. The interaction between dietary factors and alcohol consumption on breast cancer risk, by timing of alcohol consumption.

|                                | Alcohol usually taken with meals (Yes) |             |         | Alcohol usually taken with meals (No) |         |         |
|--------------------------------|----------------------------------------|-------------|---------|---------------------------------------|---------|---------|
|                                | Haz Ratio (95%CI)                      | P value     | P-trend | Haz Ratio (95%CI)                     | P value | P-trend |
| Overall                        |                                        |             |         |                                       |         |         |
| cooked vegetable               |                                        |             | 0.22    |                                       |         | 0.75    |
| < 2 servings/d                 | 1.00 (REF)                             |             |         | 1.00 (REF)                            |         |         |
| 2.0-2.9 servings/d             | 1.02(0.91-1.13)                        | 0.79        |         | 1.11(1.00-1.23)                       | 0.05    |         |
| 3.0-3.9 servings/d             | 0.96(0.86-1.08)                        | 0.50        |         | 1.05(0.94-1.17)                       | 0.39    |         |
| ≥4 servings/d                  | 0.96(0.85-1.08)                        | 0.50        |         | 1.06(0.94-1.19)                       | 0.35    |         |
| In women took alcohol<once/day |                                        |             |         |                                       |         |         |
| cooked vegetable               |                                        |             | 0.81    |                                       |         | 0.76    |
| < 2 servings/d                 | 1.00 (REF)                             |             |         | 1.00 (REF)                            |         |         |
| 2.0-2.9 servings/d             | 1.02(0.89-1.16)                        | 0.78        |         | 1.11(0.99-1.25)                       | 0.08    |         |
| 3.0-3.9 servings/d             | 1.00(0.88-1.14)                        | 1.00        |         | 1.05(0.92-1.18)                       | 0.48    |         |
| ≥4 servings/d                  | 1.03(0.89-1.19)                        | 0.68        |         | 1.06(0.93-1.22)                       | 0.83    |         |
| In women took alcohol≥once/day |                                        |             |         |                                       |         |         |
| cooked vegetable               |                                        |             | <0.01   |                                       |         | 0.86    |
| < 2 servings/d                 | 1.00 (REF)                             |             |         | 1.00 (REF)                            |         |         |
| 2.0-2.9 servings/d             | 1.00(0.81-1.24)                        | 0.97        |         | 1.09(0.88-1.36)                       | 0.42    |         |
| 3.0-3.9 servings/d             | 0.87(0.70-1.08)                        | 0.20        |         | 1.06(0.85-1.34)                       | 0.60    |         |
| ≥4 servings/d                  | 0.79(0.62-1.00)                        | <b>0.04</b> |         | 1.05(0.82-1.34)                       | 0.71    |         |
| P for interaction              |                                        | 0.15        |         |                                       | 0.52    |         |
| Overall                        |                                        |             |         |                                       |         |         |
| Raw vegetable                  |                                        |             | 0.32    |                                       |         | 0.73    |
| < 2 servings/d                 | 1.00 (REF)                             |             |         | 1.00 (REF)                            |         |         |
| 2.0-2.9 servings/d             | 1.02(0.94-1.11)                        | 0.65        |         | 1.01(0.92-1.10)                       | 0.82    |         |
| 3.0-3.9 servings/d             | 1.00(0.90-1.10)                        | 0.62        |         | 1.02(0.92-1.13)                       | 0.72    |         |
| ≥4 servings/d                  | 0.95(0.86-1.05)                        | 0.30        |         | 0.97(0.88-1.08)                       | 0.60    |         |
| In women took alcohol<once/day |                                        |             |         |                                       |         |         |
| Raw vegetable                  |                                        |             | 0.80    |                                       |         | 0.80    |
| < 2 servings/d                 | 1.00 (REF)                             |             |         | 1.00 (REF)                            |         |         |
| 2.0-2.9 servings/d             | 1.06(0.96-1.17)                        | 0.22        |         | 1.03(0.93-1.14)                       | 0.62    |         |
| 3.0-3.9 servings/d             | 1.07(0.96-1.20)                        | 0.22        |         | 1.00(0.89-1.13)                       | 0.98    |         |
| ≥4 servings/d                  | 0.97(0.86-1.08)                        | 0.55        |         | 0.99(0.88-1.10)                       | 0.80    |         |
| In women took alcohol≥once/day |                                        |             |         |                                       |         |         |
| Raw vegetable                  |                                        |             | 0.12    |                                       |         | 0.88    |
| < 2 servings/d                 | 1.00 (REF)                             |             |         | 1.00 (REF)                            |         |         |
| 2.0-2.9 servings/d             | 0.91(0.77-1.07)                        | 0.27        |         | 0.96(0.80-1.16)                       | 0.68    |         |
| 3.0-3.9 servings/d             | 0.80(0.66-0.98)                        | <b>0.03</b> |         | 1.07(0.87-1.33)                       | 0.51    |         |
| ≥4 servings/d                  | 0.90(0.75-1.08)                        | 0.27        |         | 0.95(0.77-1.17)                       | 0.62    |         |
| P for interaction              |                                        | 0.16        |         |                                       | 0.87    |         |
| Overall                        |                                        |             |         |                                       |         |         |
| Fresh fruit                    |                                        |             | <0.01   |                                       |         | 0.19    |
| < 2 servings/d                 | 1.00 (REF)                             |             |         | 1.00 (REF)                            |         |         |
| 2.0-2.9 servings/d             | 0.98(0.90-1.07)                        | 0.62        |         | 0.96(0.88-1.05)                       | 0.41    |         |
| 3.0-3.9 servings/d             | 0.93(0.85-1.02)                        | 0.14        |         | 1.01(0.92-1.11)                       | 0.83    |         |
| ≥4 servings/d                  | 0.85(0.77-0.95)                        | <0.01       |         | 0.90(0.81-1.01)                       | 0.06    |         |
| In women took alcohol<once/day |                                        |             |         |                                       |         |         |
| Fresh fruit                    |                                        |             | 0.07    |                                       |         | 0.47    |
| < 2 servings/d                 | 1.00 (REF)                             |             |         | 1.00 (REF)                            |         |         |
| 2.0-2.9 servings/d             | 1.04(0.94-1.15)                        | 0.47        |         | 0.96(0.86-1.06)                       | 0.42    |         |
| 3.0-3.9 servings/d             | 0.97(0.87-1.09)                        | 0.62        |         | 1.01(0.91-1.13)                       | 0.83    |         |
| ≥4 servings/d                  | 0.91(0.80-1.03)                        | 0.12        |         | 0.93(0.82-1.05)                       | 0.26    |         |
| In women took alcohol≥once/day |                                        |             |         |                                       |         |         |
| Fresh fruit                    |                                        |             | <0.01   |                                       |         | 0.17    |

|                                |                 |             |                 |             |
|--------------------------------|-----------------|-------------|-----------------|-------------|
| < 2 servings/d                 | 1.00 (REF)      |             | 1.00 (REF)      |             |
| 2.0-2.9 servings/d             | 0.84(0.71-0.99) | <b>0.03</b> | 0.98(0.82-1.18) | 0.85        |
| 3.0-3.9 servings/d             | 0.85(0.71-1.01) | 0.07        | 1.01(0.82-1.25) | 0.90        |
| ≥4 servings/d                  | 0.73(0.59-0.91) | <b>0.01</b> | 0.78(0.60-1.01) | 0.06        |
| P for interaction              |                 | 0.27        |                 | 0.41        |
| Overall                        |                 |             |                 |             |
| Dried fruit                    |                 |             | 0.93            | <b>0.04</b> |
| < 2 servings/d                 | 1.00 (REF)      |             | 1.00 (REF)      |             |
| 2.0-2.9 servings/d             | 1.01(0.91-1.13) | 0.81        | 0.96(0.84-1.10) | 0.53        |
| 3.0-3.9 servings/d             | 0.95(0.82-1.11) | 0.54        | 0.78(0.64-0.97) | <b>0.02</b> |
| ≥4 servings/d                  | 1.01(0.88-1.15) | 0.89        | 0.91(0.77-1.08) | 0.29        |
| In women took alcohol<once/day |                 |             |                 |             |
| Dried fruit                    |                 |             | 0.95            | <b>0.01</b> |
| < 2 servings/d                 | 1.00 (REF)      |             | 1.00 (REF)      |             |
| 2.0-2.9 servings/d             | 1.08(0.95-1.23) | 0.23        | 0.92(0.78-1.07) | 0.27        |
| 3.0-3.9 servings/d             | 0.93(0.77-1.12) | 0.43        | 0.72(0.56-0.92) | <b>0.01</b> |
| ≥4 servings/d                  | 1.01(0.87-1.18) | 0.89        | 0.87(0.71-1.05) | 0.15        |
| In women took alcohol≥once/day |                 |             |                 |             |
| Dried fruit                    |                 |             | 0.83            | 0.51        |
| < 2 servings/d                 | 1.00 (REF)      |             | 1.00 (REF)      |             |
| 2.0-2.9 servings/d             | 0.83(0.65-1.05) | 0.12        | 1.11(0.84-1.47) | 0.45        |
| 3.0-3.9 servings/d             | 1.02(0.76-1.37) | 0.89        | 1.03(0.68-1.55) | 0.90        |
| ≥4 servings/d                  | 1.01(0.88-1.31) | 0.94        | 1.09(0.78-1.53) | 0.62        |
| P for interaction              |                 | 0.46        |                 | 0.37        |
| Overall                        |                 |             |                 |             |
| Oily fish                      |                 |             | 0.54            | 0.47        |
| Never                          | 1.00 (REF)      |             | 1.00 (REF)      |             |
| < once /wk                     | 1.19(1.01-1.39) | <b>0.03</b> | 1.01(0.89-1.15) | 0.85        |
| ≥once /wk                      | 1.15(0.98-1.33) | 0.08        | 1.04(0.92-1.17) | 0.56        |
| In women took alcohol<once/day |                 |             |                 |             |
| Oily fish                      |                 |             | 0.46            | 0.93        |
| Never                          | 1.00 (REF)      |             | 1.00 (REF)      |             |
| < once /wk                     | 1.17(0.98-1.39) | 0.09        | 0.98(0.86-1.13) | 0.81        |
| ≥once /wk                      | 1.14(0.96-1.35) | 0.13        | 1.00(0.87-1.14) | 0.96        |
| In women took alcohol≥once/day |                 |             |                 |             |
| Oily fish                      |                 |             | 1.00            | 0.19        |
| Never                          | 1.00 (REF)      |             | 1.00 (REF)      |             |
| < once /wk                     | 1.26(0.89-1.77) | 0.18        | 1.16(0.86-1.56) | 0.33        |
| ≥once /wk                      | 1.18(0.85-1.64) | 0.33        | 1.22(0.92-1.63) | 0.17        |
| P for interaction              |                 | 0.10        |                 | 0.74        |
| Overall                        |                 |             |                 |             |
| Non-oily fish                  |                 |             | 0.47            | 0.91        |
| Never                          | 1.00 (REF)      |             | 1.00 (REF)      |             |
| < once /wk                     | 0.99(0.81-1.21) | 0.93        | 1.17(0.97-1.42) | 0.11        |
| ≥once /wk                      | 1.02(0.84-1.24) | 0.82        | 1.12(0.93-1.35) | 0.24        |
| In women took alcohol<once/day |                 |             |                 |             |
| Non-oily fish                  |                 |             | 0.26            | 0.80        |
| Never                          | 1.00 (REF)      |             | 1.00 (REF)      |             |
| < once /wk                     | 0.95(0.76-1.20) | 0.68        | 1.11(0.89-1.37) | 0.35        |
| ≥once /wk                      | 1.02(0.82-1.27) | 0.88        | 1.06(0.87-1.31) | 0.55        |
| In women took alcohol≥once/day |                 |             |                 |             |
| Non-oily fish                  |                 |             | 0.66            | 0.87        |
| Never                          | 1.00 (REF)      |             | 1.00 (REF)      |             |
| < once /wk                     | 1.10(0.72-1.67) | 0.66        | 1.47(0.94-2.31) | 0.09        |
| ≥once /wk                      | 1.04(0.69-1.57) | 0.84        | 1.37(0.88-2.12) | 0.16        |
| P for interaction              |                 | 0.36        |                 | 0.22        |

|                                |                 |      |             |                 |             |
|--------------------------------|-----------------|------|-------------|-----------------|-------------|
| Overall                        |                 |      |             |                 |             |
| Poultry                        |                 |      | 1.00        |                 | 0.74        |
| Never                          | 1.00 (REF)      |      |             | 1.00 (REF)      |             |
| < once /wk                     | 0.99(0.83-1.19) | 0.93 |             | 1.16(0.96-1.40) | 0.13        |
| ≥once /wk                      | 1.00(0.85-1.16) | 0.96 |             | 1.09(0.93-1.28) | 0.30        |
| In women took alcohol<once/day |                 |      |             |                 |             |
| Poultry                        |                 |      | 0.35        |                 | 0.95        |
| Never                          | 1.00 (REF)      |      |             | 1.00 (REF)      |             |
| < once /wk                     | 1.01(0.82-1.25) | 0.90 |             | 1.15(0.93-1.43) | 0.20        |
| ≥once /wk                      | 0.95(0.80-1.14) | 0.58 |             | 1.06(0.88-1.27) | 0.52        |
| In women took alcohol≥once/day |                 |      |             |                 |             |
| Poultry                        |                 |      | 0.12        |                 | 0.41        |
| Never                          | 1.00 (REF)      |      |             | 1.00 (REF)      |             |
| < once /wk                     | 0.93(0.63-1.35) | 0.69 |             | 1.21(0.82-1.79) | 0.34        |
| ≥once /wk                      | 1.14(0.82-1.57) | 0.44 |             | 1.20(0.85-1.68) | 0.30        |
| P for interaction              |                 | 0.15 |             |                 | 0.35        |
| Overall                        |                 |      |             |                 |             |
| Cheese                         |                 |      | <b>0.04</b> |                 | 0.50        |
| Never                          | 1.00 (REF)      |      |             | 1.00 (REF)      |             |
| < once /wk                     | 1.17(0.86-1.59) | 0.31 |             | 0.83(0.65-1.06) | 0.13        |
| ≥once /wk                      | 1.26(0.93-1.69) | 0.13 |             | 0.84(0.67-1.06) | 0.13        |
| In women took alcohol<once/day |                 |      |             |                 |             |
| Cheese                         |                 |      | <b>0.04</b> |                 | 0.20        |
| Never                          | 1.00 (REF)      |      |             | 1.00 (REF)      |             |
| < once /wk                     | 1.31(0.91-1.89) | 0.14 |             | 0.76(0.59-0.98) | <b>0.04</b> |
| ≥once /wk                      | 1.41(0.99-2.01) | 0.06 |             | 0.76(0.60-0.97) | <b>0.03</b> |
| In women took alcohol≥once/day |                 |      |             |                 |             |
| Cheese                         |                 |      | 0.59        |                 | 0.32        |
| Never                          | 1.00 (REF)      |      |             | 1.00 (REF)      |             |
| < once /wk                     | 0.83(0.47-1.47) | 0.52 |             | 1.61(0.71-3.67) | 0.26        |
| ≥once /wk                      | 0.90(0.52-1.57) | 0.72 |             | 1.68(0.75-3.75) | 0.21        |
| P for interaction              |                 | 0.73 |             |                 | 0.12        |

Multivariable Cox regression model adjusted for age at recruitment, smoking, ethnicity, physical activity level, BMI, townsend deprivation index, alcohol intake frequency, employment status, educational qualifications, 22 UKB centers, number of births, age at menarche, menopausal status, age at first birth, ever use of oral contraceptive pill use, ever use of hormone replacement therapy, family history of breast cancer, stratified by alcohol intake frequency,

Supplementary Table 3. The association between dietary factors and breast cancer risk, by alcohol intake unites.

|                | alcohol<2 units/day    |                        |              |              | alcohol≥2 units/day    |                        |              |              | P for interaction |
|----------------|------------------------|------------------------|--------------|--------------|------------------------|------------------------|--------------|--------------|-------------------|
|                | Cases/Participant<br>s | Hazard ratio(95% CI)   | P-ternd      | P value      | Cases/Participant<br>s | Hazard ratio(95% CI)   | P-ternd      | P value      |                   |
| Processed meat |                        |                        | 0.199        |              |                        |                        | <b>0.028</b> |              | 0.235             |
| Never          | 759/24729              | 1.00 (REF)             |              |              | 262/8157               | 1.00 (REF)             |              |              |                   |
| < once /wk     | 2359/69751             | 1.06(0.98-1.16)        |              | 0.135        | <b>1118/29258</b>      | <b>1.16(1.01-1.32)</b> |              | <b>0.036</b> |                   |
| ≥once /wk      | 2988/89018             | 1.07(0.98-1.16)        |              | 0.112        | <b>1546/39665</b>      | <b>1.19(1.04-1.36)</b> |              | <b>0.011</b> |                   |
| Beef           |                        |                        | 0.267        |              |                        |                        | 0.481        |              | 0.878             |
| Never          | 851/27497              | 1.00 (REF)             |              |              | 280/8112               | 1.00 (REF)             |              |              |                   |
| < once /wk     | 2839/85743             | 1.02(0.94-1.10)        |              | 0.705        | 1322/34450             | 1.06(0.93-1.21)        |              | 0.356        |                   |
| ≥once /wk      | 2395/69833             | 1.04(0.96-1.13)        |              | 0.326        | 1323/34453             | 1.07(0.93-1.21)        |              | 0.347        |                   |
| Lamb           |                        |                        | <b>0.006</b> |              |                        |                        | 0.762        |              | 0.596             |
| Never          | 1237/40676             | 1.00 (REF)             |              |              | 454/12809              | 1.00 (REF)             |              |              |                   |
| < once /wk     | 3443/102683            | 1.07(1.00-1.14)        |              | 0.051        | 1679/43950             | 1.03(0.92-1.14)        |              | 0.631        |                   |
| ≥once /wk      | <b>1395/39305</b>      | <b>1.12(1.03-1.21)</b> |              | <b>0.005</b> | 790/20165              | 1.02(0.91-1.15)        |              | 0.709        |                   |
| Pork           |                        |                        | 0.129        |              |                        |                        | 0.694        |              | 0.543             |
| Never          | 1253/40221             | 1.00 (REF)             |              |              | 460/12734              | 1.00 (REF)             |              |              |                   |
| < once /wk     | 3395/101344            | 1.03(0.96-1.10)        |              | 0.406        | 1756/45420             | 1.03(0.93-1.14)        |              | 0.549        |                   |
| ≥once /wk      | 1429/41173             | 1.06(0.98-1.15)        |              | 0.135        | 705/18755              | 0.99(0.88-1.11)        |              | 0.827        |                   |
| Poultry        |                        |                        | 0.234        |              |                        |                        | 0.550        |              | 0.741             |
| Never          | 351/11918              | 1.00 (REF)             |              |              | 140/4219               | 1.00 (REF)             |              |              |                   |
| < once /wk     | 669/19633              | 1.08(0.95-1.23)        |              | 0.255        | 280/7076               | 1.11(0.9-1.36)         |              | 0.32         |                   |
| ≥once /wk      | 5093/152074            | 1.08(0.97-1.21)        |              | 0.165        | 2508/65801             | 1.09(0.91-1.29)        |              | 0.351        |                   |
| Oily fish      |                        |                        | 0.510        |              |                        |                        | 0.389        |              | 0.376             |
| Never          | 671/22176              | 1.00 (REF)             |              |              | 193/5830               |                        |              |              |                   |
| < once /wk     | 1982/59022             | 1.07(0.98-1.17)        |              | 0.113        | 902/23999              | 1.10(0.94-1.29)        |              | 0.231        |                   |
| ≥once /wk      | 3436/101710            | 1.05(0.97-1.15)        |              | 0.221        | 1828/47130             | 1.10(0.95-1.28)        |              | 0.212        |                   |
| Non-oily fish  |                        |                        | 0.228        |              |                        |                        | 0.758        |              | 0.067             |
| Never          | 300/10178              | 1.00 (REF)             |              |              | 77/2616                | 1.00 (REF)             |              |              |                   |
| < once /wk     | 1751/53268             | 1.06(0.94-1.20)        |              | 0.326        | <b>817/20613</b>       | <b>1.31(1.03-1.65)</b> |              | <b>0.026</b> |                   |
| ≥once /wk      | 4042/119562            | 1.08(0.96-1.22)        |              | 0.201        | 2025/53761             | 1.22(0.97-1.53)        |              | 0.091        |                   |
| Cheese         |                        |                        | 0.537        |              |                        |                        | 0.192        |              | 0.884             |
| Never          | 180/5720               | 1.00 (REF)             |              |              | 34/1010                | 1.00 (REF)             |              |              |                   |

|                          |                    |                        |              |              |                  |                        |              |              |
|--------------------------|--------------------|------------------------|--------------|--------------|------------------|------------------------|--------------|--------------|
| < once /wk               | 1265/38090         | 1.04(0.89-1.21)        |              | 0.659        | 443/12000        | 1.11(0.78-1.57)        |              | 0.572        |
| ≥once /wk                | 4502/134522        | 1.05(0.90-1.22)        |              | 0.554        | 2402/62837       | 1.17(0.83-1.64)        |              | 0.372        |
| Cooked vegetable         |                    |                        | 0.742        |              |                  |                        | 0.813        | 0.336        |
| < 2 servings/d           | 1030/31297         | 1.00 (REF)             |              |              | 407/11575        | 1.00 (REF)             |              |              |
| 2.0-2.9 servings/d       | 2092/62177         | 1.00(0.92-1.07)        |              | 0.933        | 1057/26547       | 1.09(0.97-1.23)        |              | 0.126        |
| 3.0-3.9 servings/d       | 1717/51412         | 0.99(0.91-1.07)        |              | 0.722        | 822/22543        | 0.99(0.87-1.11)        |              | 0.807        |
| ≥4 servings/d            | 1229/37073         | 0.99(0.91-1.08)        |              | 0.801        | 628/16101        | 1.05(0.93-1.2)         |              | 0.422        |
| Raw vegetable            |                    |                        | <b>0.011</b> |              |                  |                        | 0.590        | 0.638        |
| < 2 servings/d           | 2554/73566         | 1.00 (REF)             |              |              | 1005/26568       | 1.00 (REF)             |              |              |
| 2.0-2.9 servings/d       | 1490/45005         | 0.96(0.90-1.02)        |              | 0.206        | 783/20278        | 1.01(0.92-1.11)        |              | 0.867        |
| 3.0-3.9 servings/d       | 930/28303          | 0.95(0.88-1.03)        |              | 0.2          | 524/13271        | 1.03(0.93-1.15)        |              | 0.528        |
| ≥4 servings/d            | <b>1086/34848</b>  | <b>0.91(0.85-0.98)</b> |              | <b>0.012</b> | 606/16626        | 0.96(0.87-1.06)        |              | 0.414        |
| Fresh fruit              |                    |                        | <b>0.001</b> |              |                  |                        | <b>0.039</b> | 0.235        |
| < 2 servings/d           | 1724/51260         | 1.00 (REF)             |              |              | 994/25769        | 1.00 (REF)             |              |              |
| 2.0-2.9 servings/d       | 1814/53007         | 0.99(0.93-1.06)        |              | 0.774        | 875/23143        | 0.96(0.87-1.05)        |              | 0.348        |
| 3.0-3.9 servings/d       | 1452/43189         | 0.96(0.89-1.03)        |              | 0.253        | 659/16546        | 1.00(0.90-1.10)        |              | 0.992        |
| ≥4 servings/d            | <b>1107/35814</b>  | <b>0.88(0.81-0.95)</b> |              | <b>0.001</b> | <b>396/11559</b> | <b>0.85(0.75-0.95)</b> |              | <b>0.006</b> |
| Dried fruit              |                    |                        | 0.092        |              |                  |                        | 0.850        | 0.692        |
| < 2 servings/d           | 4877/145405        | 1.00 (REF)             |              |              | 2391/62943       | 1.00 (REF)             |              |              |
| 2.0-2.9 servings/d       | 548/16465          | 0.98(0.89-1.07)        |              | 0.608        | 231/6271         | 0.95(0.83-1.09)        |              | 0.449        |
| 3.0-3.9 servings/d       | 248/8173           | 0.89(0.78-1.01)        |              | 0.065        | 117/3181         | 0.94(0.78-1.13)        |              | 0.498        |
| ≥4 servings/d            | 376/11625          | 0.95(0.85-1.05)        |              | 0.328        | 168/4200         | 1.03(0.88-1.20)        |              | 0.742        |
| Healthy dietary patterns |                    |                        | <b>0.022</b> |              |                  |                        | 0.691        | 0.257        |
| poor dietary pattern     | 792/22272          | 1.00 (REF)             |              |              | 380/10428        | 1.00 (REF)             |              |              |
| medium dietary pattern   | <b>3726/112673</b> | <b>0.92(0.85-0.99)</b> |              | <b>0.027</b> | 1831/47452       | 1.04(0.94-1.17)        |              | 0.41         |
| ideal dietary pattern    | <b>11462/44744</b> | <b>0.89(0.82-0.98)</b> |              | <b>0.013</b> | 695/18607        | 0.99(0.88-1.13)        |              | 0.928        |

Supplementary Table 4. The association between processed and red meat and breast cancer risk, by menopausal status.

|                                 | In premenopausal women |              |                    |             |         | In postmenopausal women |              |                    |             |             |
|---------------------------------|------------------------|--------------|--------------------|-------------|---------|-------------------------|--------------|--------------------|-------------|-------------|
|                                 | Total No.              | No. of cases | Haz Ratio (95% CI) | P value     | P-trend | Total No.               | No. of cases | Haz Ratio (95% CI) | P value     | P-trend     |
| Overall                         |                        |              |                    |             |         |                         |              |                    |             |             |
| Processed meat                  |                        |              |                    |             | 0.18    |                         |              |                    |             | <b>0.03</b> |
| Never                           | 8 325                  | 214          | 1.00 (REF)         |             |         | 19 950                  | 640          | 1.00 (REF)         |             |             |
| < once /wk                      | 22 036                 | <b>691</b>   | 1.22(1.04-1.42)    | <b>0.01</b> |         | 61 062                  | <b>2 248</b> | 1.10(1.01-1.21)    | <b>0.03</b> |             |
| ≥once /wk                       | 33 008                 | <b>982</b>   | 1.17(1.01-1.37)    | <b>0.04</b> |         | 74 998                  | <b>2 811</b> | 1.12(1.03-1.22)    | <b>0.01</b> |             |
| In women took                   |                        |              |                    |             |         |                         |              |                    |             |             |
| Processed meat                  |                        |              |                    |             | 0.38    |                         |              |                    |             | 0.17        |
| Never                           | 7 290                  | 185          | 1.00 (REF)         |             |         | 16 915                  | 541          | 1.00 (REF)         |             |             |
| < once /wk                      | 19 129                 | <b>597</b>   | 1.23(1.05-1.46)    | <b>0.01</b> |         | 50 210                  | 1 817        | 1.09(0.99-1.20)    | 0.09        |             |
| ≥once /wk                       | 28 320                 | 809          | 1.16(0.98-1.36)    | 0.08        |         | 61 488                  | 2 234        | 1.09(0.99-1.20)    | 0.08        |             |
| In women took alcohol ≥once/day |                        |              |                    |             |         |                         |              |                    |             |             |
| Processed meat                  |                        |              |                    |             | 0.15    |                         |              |                    |             | <b>0.03</b> |
| Never                           | 1 028                  | 29           | 1.00 (REF)         |             |         | 3 018                   | 99           | 1.00 (REF)         |             |             |
| < once /wk                      | 2 896                  | 94           | 1.10(0.72-1.68)    | 0.65        |         | 10 816                  | 431          | 1.19(0.96-1.49)    | 0.11        |             |
| ≥once /wk                       | 4 666                  | 172          | 1.28(0.86-1.90)    | 0.23        |         | 13 456                  | <b>577</b>   | 1.28(1.03-1.58)    | <b>0.03</b> |             |
| P for interaction               |                        |              |                    | 0.07        |         |                         |              |                    | 0.25        |             |
| Overall                         |                        |              |                    |             |         |                         |              |                    |             |             |
| Beef                            |                        |              |                    |             | 0.22    |                         |              |                    |             | <b>0.04</b> |
| Never                           | 10 217                 | 272          | 1.00 (REF)         |             |         | 20 395                  | 666          | 1.00 (REF)         |             |             |
| < once /wk                      | 28 305                 | 862          | 1.12(0.97-1.28)    | 0.11        |         | 72 760                  | 2 635        | 1.05(0.97-1.15)    | 0.22        |             |
| ≥once /wk                       | 24 752                 | 753          | 1.12(0.97-1.29)    | 0.13        |         | 62 562                  | <b>2 383</b> | 1.09(1.00-1.19)    | <b>0.04</b> |             |
| In women took                   |                        |              |                    |             |         |                         |              |                    |             |             |
| Beef                            |                        |              |                    |             | 0.38    |                         |              |                    |             | 0.08        |
| Never                           | 9 114                  | 245          | 1.00 (REF)         |             |         | 17 546                  | 567          | 1.00 (REF)         |             |             |
| < once /wk                      | 24 585                 | 725          | 1.08(0.93-1.25)    | 0.31        |         | 60 233                  | 2 125        | 1.04(0.95-1.14)    | 0.43        |             |
| ≥once /wk                       | 20 947                 | 621          | 1.08(0.93-1.26)    | 0.30        |         | 50 570                  | 1 886        | 1.08(0.98-1.19)    | 0.16        |             |
| In women took alcohol ≥once/day |                        |              |                    |             |         |                         |              |                    |             |             |
| Beef                            |                        |              |                    |             | 0.30    |                         |              |                    |             | 0.31        |

|                                |        |              |                 |             |        |              |                 |                 |
|--------------------------------|--------|--------------|-----------------|-------------|--------|--------------|-----------------|-----------------|
| Never                          | 1 090  | 27           | 1.00 (REF)      |             | 2 830  | 99           | 1.00 (REF)      |                 |
| < once /wk                     | 3 706  | 136          | 1.42(0.94-2.16) | 0.10        | 12 479 | 510          | 1.14(0.91-1.41) | 0.25            |
| ≥once /wk                      | 3 788  | 132          | 1.38(0.91-2.11) | 0.13        | 11 951 | 497          | 1.15(0.92-1.43) | 0.21            |
| P for interaction              |        |              |                 | 0.35        |        |              |                 | 0.88            |
| Overall                        |        |              |                 |             |        |              |                 |                 |
| Lamb                           |        |              |                 | <b>0.04</b> |        |              |                 | <b>0.01</b>     |
| Never                          | 15 774 | 420          | 1.00 (REF)      |             | 29 699 | 981          | 1.00 (REF)      |                 |
| < once /wk                     | 35 677 | <b>1 103</b> | 1.14(1.02-1.28) | <b>0.02</b> | 87 716 | <b>3 218</b> | 1.08(1.00-1.16) | <b>0.04</b>     |
| ≥once /wk                      | 11 717 | <b>359</b>   | 1.15(1.00-1.33) | <b>0.04</b> | 37 993 | <b>1 478</b> | 1.12(1.03-1.21) | <b>&lt;0.01</b> |
| In women took                  |        |              |                 |             |        |              |                 |                 |
| Lamb                           |        |              |                 | <b>0.04</b> |        |              |                 | 0.06            |
| Never                          | 14 001 | 362          | 1.00 (REF)      |             | 25 705 | 839          | 1.00 (REF)      |                 |
| < once /wk                     | 30 793 | 939          | 1.17(1.04-1.32) | <b>0.01</b> | 72 472 | 2 619        | 1.08(1.00-1.17) | 0.06            |
| ≥once /wk                      | 9 759  | 286          | 1.16(0.99-1.36) | 0.06        | 29 897 | <b>1 112</b> | 1.10(1.00-1.20) | <b>0.04</b>     |
| In women took alcohol≥once/day |        |              |                 |             |        |              |                 |                 |
| Lamb                           |        |              |                 | 0.62        |        |              |                 | <b>0.04</b>     |
| Never                          | 1 761  | 58           | 1.00 (REF)      |             | 3 970  | 142          | 1.00 (REF)      |                 |
| < once /wk                     | 4 867  | 163          | 0.97(0.71-1.31) | 0.83        | 15 192 | 599          | 1.07(0.89-1.28) | 0.49            |
| ≥once /wk                      | 1 946  | 73           | 1.08(0.76-1.54) | 0.66        | 8 069  | 366          | 1.20(0.98-1.46) | 0.07            |
| P for interaction              |        |              |                 | 0.39        |        |              |                 | 0.50            |
| Overall                        |        |              |                 |             |        |              |                 |                 |
| Pork                           |        |              |                 | 0.13        |        |              |                 | 0.48            |
| Never                          | 15 322 | 426          | 1.00 (REF)      |             | 29 727 | 1 019        | 1.00 (REF)      |                 |
| < once /wk                     | 35 227 | 1 067        | 1.06(0.94-1.18) | 0.35        | 88 476 | 3 272        | 1.04(0.97-1.11) | 0.31            |
| ≥once /wk                      | 12 650 | 390          | 1.11(0.97-1.28) | 0.13        | 37 211 | 1 387        | 1.03(0.95-1.12) | 0.43            |
| In women took                  |        |              |                 |             |        |              |                 |                 |
| Pork                           |        |              |                 | 0.27        |        |              |                 | 0.65            |
| Never                          | 13 546 | 376          | 1.00 (REF)      |             | 25 567 | 869          | 1.00 (REF)      |                 |
| < once /wk                     | 30 210 | 888          | 1.02(0.91-1.16) | 0.64        | 72 346 | 2 607        | 1.02(0.95-1.11) | 0.55            |
| ≥once /wk                      | 10 823 | 324          | 1.09(0.94-1.27) | 0.26        | 30 175 | 1 096        | 1.02(0.93-1.12) | 0.63            |
| In women took alcohol≥once/day |        |              |                 |             |        |              |                 |                 |
| Pork                           |        |              |                 | 0.26        |        |              |                 | 0.50            |

|                   |       |     |                 |      |        |     |                 |      |
|-------------------|-------|-----|-----------------|------|--------|-----|-----------------|------|
| Never             | 1 762 | 50  | 1.00 (REF)      |      | 4 131  | 150 | 1.00 (REF)      |      |
| < once /wk        | 5 004 | 179 | 1.22(0.89-1.68) | 0.22 | 16 090 | 665 | 1.10(0.92-1.32) | 0.28 |
| ≥once /wk         | 1 813 | 65  | 1.25(0.86-1.81) | 0.25 | 7 006  | 291 | 1.09(0.90-1.34) | 0.38 |
| P for interaction |       |     |                 | 0.71 |        |     |                 | 0.76 |

Multivariable Cox regression model adjusted for age at recruitment, cooked vegetables, fresh fruit intake, smoking, ethnicity, physical activity level, Townsend deprivation index, alcohol intake frequency, employment status, educational qualifications, BMI, 22 UKB centers, number of births, age at menarche, menopausal status, age at first birth, ever use of oral contraceptive pill use, ever use of hormone replacement therapy, family history of breast cancer, stratified by alcohol intake frequency and menopausal status.

Supplementary Table 5. The interaction between dietary factors and alcohol consumption on breast cancer risk, by Townsend deprivation index

|                | Townsend deprivation index lower category |              |                    |             |         | Townsend deprivation index higher category |              |                    |             |             | P for interaction |
|----------------|-------------------------------------------|--------------|--------------------|-------------|---------|--------------------------------------------|--------------|--------------------|-------------|-------------|-------------------|
|                | Total No.                                 | No. of cases | Haz Ratio (95% CI) | P value     | P-trend | Total No.                                  | No. of cases | Haz Ratio (95% CI) | P value     | P-trend     |                   |
| Processed meat |                                           |              |                    |             | 0.21    |                                            |              |                    |             | <b>0.03</b> | 0.43              |
| Never          | 14 654                                    | 475          | 1.00 (REF)         |             |         | 18 235                                     | 547          | 1.00 (REF)         |             |             |                   |
| < once /wk     | 50 797                                    | 1 822        | 1.08(0.97-1.19)    | 0.15        |         | 48 161                                     | 1 653        | 1.10(1.00-1.21)    | 0.06        |             |                   |
| ≥once /wk      | 65 079                                    | 2 327        | 1.08(0.98-1.20)    | 0.12        |         | 63 539                                     | 2 207        | 1.12(1.02-1.24)    | <b>0.02</b> |             |                   |
| Beef           |                                           |              |                    |             | 0.28    |                                            |              |                    |             | 0.25        | 0.99              |
| Never          | 14 735                                    | 481          | 1.00 (REF)         |             |         | 20 880                                     | 651          | 1.00 (REF)         |             |             |                   |
| < once /wk     | 59 851                                    | 2 115        | 1.04(0.94-1.15)    | 0.45        |         | 60 276                                     | 2 044        | 1.03(0.94-1.12)    | 0.58        |             |                   |
| ≥once /wk      | 55 796                                    | 2 019        | 1.06(0.96-1.17)    | 0.27        |         | 48 443                                     | 1 699        | 1.05(0.96-1.16)    | 0.26        |             |                   |
| Lamb           |                                           |              |                    |             | 0.05    |                                            |              |                    |             | 0.08        | 0.86              |
| Never          | 24 269                                    | 783          | 1.00 (REF)         |             |         | 29 190                                     | 907          | 1.00 (REF)         |             |             |                   |
| < once /wk     | 76 105                                    | 2 694        | 1.06(0.98-1.15)    | 0.18        |         | 70 442                                     | 2 427        | 1.07(0.99-1.15)    | 0.10        |             |                   |
| ≥once /wk      | 29 814                                    | 1 130        | 1.10(1.00-1.20)    | <b>0.04</b> |         | 29 650                                     | 1 055        | 1.09(0.99-1.19)    | 0.07        |             |                   |
| Pork           |                                           |              |                    |             | 0.61    |                                            |              |                    |             | <b>0.03</b> | 0.15              |
| Never          | 22 825                                    | 786          | 1.00 (REF)         |             |         | 30 117                                     | 926          | 1.00 (REF)         |             |             |                   |
| < once /wk     | 76 485                                    | 2 737        | 1.01(0.93-1.09)    | 0.85        |         | 70 192                                     | 2 412        | 1.06(0.98-1.14)    | 0.15        |             |                   |
| ≥once /wk      | 30 867                                    | 1 088        | 0.98(0.89-1.08)    | 0.67        |         | 29 039                                     | 1 047        | 1.11(1.01-1.21)    | <b>0.03</b> |             |                   |
| Poultry        |                                           |              |                    |             | 0.56    |                                            |              |                    |             | 0.19        | 0.31              |
| Never          | 6 743                                     | 204          | 1.00 (REF)         |             |         | 9 398                                      | 287          | 1.00 (REF)         |             |             |                   |
| < once /wk     | 11 723                                    | 449          | 1.18(1.00-1.40)    | <b>0.04</b> |         | 14 984                                     | 500          | 1.01(0.88-1.17)    | 0.86        |             |                   |
| ≥once /wk      | 112 087                                   | 3 972        | 1.11(0.97-1.28)    | 0.14        |         | 105 678                                    | 3 627        | 1.07(0.94-1.20)    | 0.31        |             |                   |
| Oily fish      |                                           |              |                    |             | 0.78    |                                            |              |                    |             | 0.14        | 0.20              |
| Never          | 11 228                                    | 371          | 1.00 (REF)         |             |         | 16 775                                     | 493          | 1.00 (REF)         |             |             |                   |
| < once /wk     | 41 277                                    | 1 449        | 1.03(0.92-1.15)    | 0.64        |         | 41 696                                     | 1 434        | 1.13(1.02-1.25)    | <b>0.02</b> |             |                   |
| ≥once /wk      | 77 810                                    | 2 794        | 1.03(0.92-1.14)    | 0.65        |         | 70 969                                     | 2 469        | 1.11(1.01-1.23)    | <b>0.04</b> |             |                   |
| Non-oily fish  |                                           |              |                    |             | 0.43    |                                            |              |                    |             | 0.51        | 0.14              |
| Never          | 5 081                                     | 163          | 1.00 (REF)         |             |         | 7 717                                      | 214          | 1.00 (REF)         |             |             |                   |
| < once /wk     | 35 274                                    | 1 231        | 1.05(0.89-1.23)    | 0.60        |         | 38 570                                     | 1 336        | 1.19(1.03-1.37)    | <b>0.02</b> |             |                   |
| ≥once /wk      | 89 991                                    | 3 215        | 1.06(0.91-1.24)    | 0.46        |         | 83 254                                     | 2 851        | 1.15(1.00-1.33)    | <b>0.04</b> |             |                   |
| Cheese         |                                           |              |                    |             | 0.04    |                                            |              |                    |             | 0.98        | 0.32              |

|                          |         |       |                 |                 |         |       |                 |             |                 |      |
|--------------------------|---------|-------|-----------------|-----------------|---------|-------|-----------------|-------------|-----------------|------|
| Never                    | 2 770   | 78    | 1.00 (REF)      |                 | 3 958   | 134   | 1.00 (REF)      |             |                 |      |
| < once /wk               | 23 687  | 822   | 1.22(0.97-1.54) | 0.09            | 26 379  | 886   | 0.97(0.81-1.16) | 0.74        |                 |      |
| ≥once /wk                | 101 375 | 3 621 | 1.27(1.02-1.60) | <b>0.03</b>     | 95 892  | 3 283 | 0.98(0.82-1.17) | 0.81        |                 |      |
| Cooked vegetable         |         |       |                 | 0.50            |         |       |                 |             | 0.79            | 0.61 |
| < 2 servings/d           | 18 626  | 654   | 1.00 (REF)      |                 | 24 224  | 783   | 1.00 (REF)      |             |                 |      |
| 2.0-2.9 servings/d       | 46 577  | 1 676 | 1.00(0.92-1.10) | 0.92            | 42 088  | 1 471 | 1.05(0.96-1.14) | 0.29        |                 |      |
| 3.0-3.9 servings/d       | 38 934  | 1 348 | 0.96(0.87-1.05) | 0.38            | 34 989  | 1 191 | 1.02(0.93-1.11) | 0.75        |                 |      |
| ≥4 servings/d            | 25 832  | 924   | 0.99(0.89-1.09) | 0.82            | 27 333  | 932   | 1.03(0.94-1.14) | 0.51        |                 |      |
| Raw vegetable            |         |       |                 | 0.34            |         |       |                 |             | <b>0.03</b>     | 0.86 |
| < 2 servings/d           | 50 038  | 1 800 | 1.00 (REF)      |                 | 50 053  | 1 759 | 1.00 (REF)      |             |                 |      |
| 2.0-2.9 servings/d       | 33 920  | 1 197 | 0.98(0.91-1.05) | 0.58            | 31 323  | 1 075 | 0.97(0.90-1.05) | 0.50        |                 |      |
| 3.0-3.9 servings/d       | 21 094  | 756   | 1.00(0.91-1.08) | 0.91            | 20 460  | 698   | 0.97(0.89-1.06) | 0.49        |                 |      |
| ≥4 servings/d            | 24 665  | 847   | 0.95(0.88-1.04) | 0.26            | 26 789  | 844   | 0.91(0.83-0.98) | <b>0.02</b> |                 |      |
| Fresh fruit              |         |       |                 | <b>&lt;0.01</b> |         |       |                 |             | <b>&lt;0.01</b> | 0.29 |
| < 2 servings/d           | 36 171  | 1 308 | 1.00 (REF)      |                 | 40 830  | 1 410 | 1.00 (REF)      |             |                 |      |
| 2.0-2.9 servings/d       | 39 359  | 1 422 | 0.99(0.91-1.06) | 0.70            | 36 756  | 1 266 | 0.97(0.90-1.05) | 0.46        |                 |      |
| 3.0-3.9 servings/d       | 31 229  | 1 134 | 0.99(0.91-1.07) | 0.72            | 28 483  | 977   | 0.96(0.88-1.04) | 0.30        |                 |      |
| ≥4 servings/d            | 23 672  | 753   | 0.85(0.78-0.94) | <b>&lt;0.01</b> | 23 676  | 749   | 0.88(0.81-0.97) | <b>0.01</b> |                 |      |
| Dried fruit              |         |       |                 | 0.13            |         |       |                 |             | 0.47            | 0.23 |
| < 2 servings/d           | 103 691 | 3 717 | 1.00 (REF)      |                 | 104 544 | 3 551 | 1.00 (REF)      |             |                 |      |
| 2.0-2.9 servings/d       | 11 943  | 404   | 0.93(0.84-1.03) | 0.16            | 10 790  | 375   | 1.01(0.91-1.13) | 0.83        |                 |      |
| 3.0-3.9 servings/d       | 5 832   | 176   | 0.82(0.71-0.96) | <b>0.01</b>     | 5 521   | 188   | 0.99(0.85-1.15) | 0.88        |                 |      |
| ≥4 servings/d            | 8 071   | 294   | 0.99(0.88-1.12) | 0.88            | 7 754   | 249   | 0.94(0.83-1.07) | 0.35        |                 |      |
| Healthy dietary patterns |         |       |                 | 0.13            |         |       |                 |             | 0.16            | 0.47 |
| poor dietary pattern     | 16 085  | 584   | 1.00 (REF)      |                 | 16 596  | 588   | 1.00 (REF)      |             |                 |      |
| medium dietary pattern   | 81 099  | 2 882 | 0.97(0.89-1.06) | 0.56            | 78 923  | 2 675 | 0.94(0.86-1.03) | 0.20        |                 |      |
| ideal dietary pattern    | 31 949  | 1 101 | 0.93(0.84-1.03) | 0.17            | 31 372  | 1 054 | 0.92(0.83-1.02) | 0.13        |                 |      |

Supplementary Table 6. The interaction between dietary factors and alcohol consumption on breast cancer risk, by education level

|                | Holding a college/post-secondary degree /NVQ |              |                   |             |             | Educational level lower category |              |                   |         |         | P for interaction |
|----------------|----------------------------------------------|--------------|-------------------|-------------|-------------|----------------------------------|--------------|-------------------|---------|---------|-------------------|
|                | Total No.                                    | No. of cases | Haz Ratio (95%CI) | P value     | P-trend     | Total No.                        | No. of cases | Haz Ratio (95%CI) | P value | P-trend |                   |
| Processed meat |                                              |              |                   |             | <b>0.02</b> |                                  |              |                   |         | 0.28    | 0.35              |
| Never          | 16 819                                       | 505          | 1.00 (REF)        |             |             | 16 108                           | 517          | 1.00 (REF)        |         |         |                   |
| < once /wk     | 43 666                                       | 1 501        | 1.11(1.00-1.22)   | <b>0.05</b> |             | 55 400                           | 1 976        | 1.08(0.98-1.19)   | 0.13    |         |                   |
| ≥once /wk      | 52 675                                       | 1 846        | 1.14(1.03-1.26)   | <b>0.01</b> |             | 76 107                           | 2 690        | 1.08(0.98-1.18)   | 0.13    |         |                   |
| Beef           |                                              |              |                   |             | 0.08        |                                  |              |                   |         | 0.60    | 0.83              |
| Never          | 17 883                                       | 554          | 1.00 (REF)        |             |             | 17 773                           | 578          | 1.00 (REF)        |         |         |                   |
| < once /wk     | 52 185                                       | 1 774        | 1.04(0.95-1.15)   | 0.42        |             | 68 089                           | 2 389        | 1.03(0.94-1.13)   | 0.57    |         |                   |
| ≥once /wk      | 42 973                                       | 1 517        | 1.09(0.98-1.20)   | 0.10        |             | 61 388                           | 2 201        | 1.03(0.94-1.13)   | 0.52    |         |                   |
| Lamb           |                                              |              |                   |             | <b>0.03</b> |                                  |              |                   |         | 0.13    | 0.80              |
| Never          | 23 785                                       | 725          | 1.00 (REF)        |             |             | 29 751                           | 966          | 1.00 (REF)        |         |         |                   |
| < once /wk     | 64 553                                       | 2 229        | 1.08(1.00-1.18)   | 0.06        |             | 82 172                           | 2 895        | 1.05(0.97-1.13)   | 0.24    |         |                   |
| ≥once /wk      | 24 587                                       | 894          | 1.12(1.01-1.24)   | <b>0.03</b> |             | 34 931                           | 1 291        | 1.07(0.98-1.16)   | 0.12    |         |                   |
| Pork           |                                              |              |                   |             | 0.30        |                                  |              |                   |         | 0.45    | 0.89              |
| Never          | 24 748                                       | 782          | 1.00 (REF)        |             |             | 28 267                           | 931          | 1.00 (REF)        |         |         |                   |
| < once /wk     | 64 977                                       | 2 244        | 1.04(0.95-1.12)   | 0.41        |             | 81 862                           | 2 907        | 1.04(0.96-1.12)   | 0.31    |         |                   |
| ≥once /wk      | 23 211                                       | 823          | 1.05(0.95-1.16)   | 0.30        |             | 36 770                           | 1 313        | 1.04(0.95-1.13)   | 0.39    |         |                   |
| Poultry        |                                              |              |                   |             | 0.08        |                                  |              |                   |         | 0.76    | 0.50              |
| Never          | 9 247                                        | 277          | 1.00 (REF)        |             |             | 6 913                            | 214          | 1.00 (REF)        |         |         |                   |
| < once /wk     | 12 654                                       | 428          | 1.05(0.90-1.22)   | 0.56        |             | 14 082                           | 521          | 1.12(0.96-1.32)   | 0.15    |         |                   |
| ≥once /wk      | 91 307                                       | 3 150        | 1.1(0.97-1.25)    | 0.13        |             | 126 720                          | 4 453        | 1.08(0.94-1.24)   | 0.29    |         |                   |
| Oily fish      |                                              |              |                   |             | 0.89        |                                  |              |                   |         | 0.13    | 0.09              |
| Never          | 10 644                                       | 316          | 1.00 (REF)        |             |             | 17 400                           | 548          | 1.00 (REF)        |         |         |                   |
| < once /wk     | 36 815                                       | 1 293        | 1.13(1.00-1.28)   | <b>0.04</b> |             | 46 261                           | 1 591        | 1.05(0.95-1.16)   | 0.35    |         |                   |
| ≥once /wk      | 65 522                                       | 2 241        | 1.08(0.96-1.22)   | 0.22        |             | 83 421                           | 3 025        | 1.07(0.98-1.18)   | 0.13    |         |                   |
| Non-oily fish  |                                              |              |                   |             | 0.97        |                                  |              |                   |         | 0.17    | 0.18              |
| Never          | 5 967                                        | 178          | 1.00 (REF)        |             |             | 6 850                            | 199          | 1.00 (REF)        |         |         |                   |
| < once /wk     | 33 073                                       | 1 151        | 1.11(0.95-1.3)    | 0.19        |             | 40 860                           | 1 417        | 1.14(0.98-1.32)   | 0.08    |         |                   |
| ≥once /wk      | 73 950                                       | 2 522        | 1.08(0.93-1.26)   | 0.33        |             | 99 497                           | 3 547        | 1.15(1-1.33)      | 0.06    |         |                   |
| Cheese         |                                              |              |                   |             | 0.15        |                                  |              |                   |         | 0.55    | 0.18              |

|                          |        |       |                 |                 |         |       |                 |             |                 |                  |
|--------------------------|--------|-------|-----------------|-----------------|---------|-------|-----------------|-------------|-----------------|------------------|
| Never                    | 2 265  | 76    | 1.00 (REF)      |                 | 4 472   | 138   | 1.00 (REF)      |             |                 |                  |
| < once /wk               | 19 158 | 603   | 0.91(0.72-1.16) | 0.44            | 30 983  | 1 105 | 1.14(0.95-1.36) | 0.15        |                 |                  |
| ≥once /wk                | 89 218 | 3 102 | 0.99(0.79-1.25) | 0.94            | 108 264 | 3 804 | 1.13(0.95-1.34) | 0.17        |                 |                  |
| Cooked vegetable         |        |       |                 |                 |         |       |                 |             | 0.18            | 0.38 0.24        |
| < 2 servings/d           | 18 763 | 651   | 1.00 (REF)      |                 | 24 149  | 786   | 1.00 (REF)      |             |                 |                  |
| 2.0-2.9 servings/d       | 39 170 | 1 370 | 0.99(0.90-1.08) | 0.76            | 49 606  | 1 779 | 1.06(0.98-1.16) | 0.15        |                 |                  |
| 3.0-3.9 servings/d       | 31 445 | 1 035 | 0.92(0.84-1.02) | 0.11            | 42 557  | 1 505 | 1.04(0.96-1.14) | 0.34        |                 |                  |
| ≥4 servings/d            | 23 302 | 780   | 0.95(0.86-1.06) | 0.38            | 29 917  | 1 077 | 1.06(0.97-1.17) | 0.20        |                 |                  |
| Raw vegetable            |        |       |                 |                 |         |       |                 |             | 0.08            | 0.16 0.83        |
| < 2 servings/d           | 42 219 | 1 487 | 1.00 (REF)      |                 | 57 991  | 2 074 | 1.00 (REF)      |             |                 |                  |
| 2.0-2.9 servings/d       | 29 300 | 988   | 0.95(0.88-1.03) | 0.23            | 36 020  | 1 285 | 1.00(0.93-1.07) | 0.90        |                 |                  |
| 3.0-3.9 servings/d       | 18 121 | 628   | 0.98(0.89-1.08) | 0.69            | 23 480  | 826   | 0.98(0.91-1.07) | 0.68        |                 |                  |
| ≥4 servings/d            | 23 015 | 735   | 0.91(0.83-1.00) | <b>0.04</b>     | 28 503  | 957   | 0.94(0.87-1.02) | 0.14        |                 |                  |
| Fresh fruit              |        |       |                 |                 |         |       |                 |             | <b>&lt;0.01</b> | <b>0.04</b> 0.06 |
| < 2 servings/d           | 31 699 | 1 147 | 1.00 (REF)      |                 | 45 409  | 1 573 | 1.00 (REF)      |             |                 |                  |
| 2.0-2.9 servings/d       | 33 987 | 1 160 | 0.93(0.86-1.01) | 0.09            | 42 206  | 1 529 | 1.02(0.95-1.09) | 0.66        |                 |                  |
| 3.0-3.9 servings/d       | 26 392 | 901   | 0.93(0.85-1.01) | 0.10            | 33 387  | 1 210 | 1.01(0.93-1.09) | 0.86        |                 |                  |
| ≥4 servings/d            | 21 012 | 640   | 0.83(0.75-0.92) | <b>&lt;0.01</b> | 26 395  | 863   | 0.90(0.83-0.98) | <b>0.02</b> |                 |                  |
| Dried fruit              |        |       |                 |                 |         |       |                 |             | 0.82            | 0.07 0.56        |
| < 2 servings/d           | 89 250 | 3 054 | 1.00 (REF)      |                 | 119 255 | 4 216 | 1.00 (REF)      |             |                 |                  |
| 2.0-2.9 servings/d       | 10 767 | 350   | 0.94(0.84-1.06) | 0.31            | 11 979  | 429   | 0.99(0.90-1.09) | 0.84        |                 |                  |
| 3.0-3.9 servings/d       | 5 289  | 173   | 0.94(0.80-1.09) | 0.42            | 6 070   | 192   | 0.87(0.75-1.01) | 0.06        |                 |                  |
| ≥4 servings/d            | 7 074  | 250   | 1.03(0.90-1.17) | 0.68            | 8 769   | 294   | 0.93(0.82-1.04) | 0.21        |                 |                  |
| Healthy dietary patterns |        |       |                 |                 |         |       |                 |             | <b>&lt;0.01</b> | 0.75 0.07        |
| poor dietary pattern     | 13 537 | 507   | 1.00 (REF)      |                 | 19 186  | 665   | 1.00 (REF)      |             |                 |                  |
| medium dietary pattern   | 69 672 | 2 375 | 0.90(0.82-0.95) | <b>0.04</b>     | 90 544  | 3 184 | 1.00(0.92-1.09) | 0.96        |                 |                  |
| ideal dietary pattern    | 28 819 | 937   | 0.86(0.77-0.99) | <b>&lt;0.01</b> | 34 568  | 1 220 | 0.99(0.90-1.09) | 0.83        |                 |                  |

Supplementary Table 7. The interaction between diet and genetic risk score on breast cancer risk.

|                   | GRS       |              |                        |             | ER+ GRS   |              |                        |             | ER- GRS   |              |                        |             |
|-------------------|-----------|--------------|------------------------|-------------|-----------|--------------|------------------------|-------------|-----------|--------------|------------------------|-------------|
|                   | Total No. | No. of cases | Haz Ratio (95%CI)      | P value     | Total No. | No. of cases | Haz Ratio (95%CI)      | P value     | Total No. | No. of cases | Haz Ratio (95%CI)      | P value     |
| Quartile 1        |           |              |                        |             |           |              |                        |             |           |              |                        |             |
| Processed meat    |           |              |                        |             |           |              |                        |             |           |              |                        |             |
| Never             | 7852      | 122          | 1.00 (REF)             |             | 7860      | 128          | 1.00 (REF)             |             | 7854      | 151          | 1.00 (REF)             |             |
| < once /wk        | 24023     | <b>484</b>   | <b>1.26(1.03-1.54)</b> | <b>0.02</b> | 24013     | 474          | <b>1.18(0.97-1.44)</b> | 0.10        | 24003     | 570          | <b>1.20(1.00-1.43)</b> | 0.05        |
| ≥once /wk         | 31339     | 596          | <b>1.20(0.98-1.46)</b> | 0.07        | 31342     | 584          | <b>1.13(0.93-1.37)</b> | 0.21        | 31351     | 675          | <b>1.10(0.92-1.32)</b> | 0.29        |
| Quartile 2        |           |              |                        |             |           |              |                        |             |           |              |                        |             |
| Processed meat    |           |              |                        |             |           |              |                        |             |           |              |                        |             |
| Never             | 7796      | 181          | 1.00 (REF)             |             | 7845      | 185          | 1.00 (REF)             |             | 7930      | 201          | 1.00 (REF)             |             |
| < once /wk        | 23872     | 652          | <b>1.12(0.95-1.32)</b> | 0.18        | 23890     | 642          | <b>1.09(0.92-1.29)</b> | 0.30        | 23905     | 722          | <b>1.16(0.99-1.35)</b> | 0.07        |
| ≥once /wk         | 31527     | 846          | <b>1.12(0.95-1.32)</b> | 0.16        | 31444     | 871          | <b>1.14(0.97-1.34)</b> | 0.10        | 31317     | 948          | <b>1.17(1.00-1.36)</b> | 0.05        |
| Quartile 3        |           |              |                        |             |           |              |                        |             |           |              |                        |             |
| Processed meat    |           |              |                        |             |           |              |                        |             |           |              |                        |             |
| Never             | 7949      | 262          | 1.00 (REF)             |             | 7888      | 248          | 1.00 (REF)             |             | 8068      | 288          | 1.00 (REF)             |             |
| < once /wk        | 24202     | 909          | <b>1.10(0.96-1.26)</b> | 0.19        | 24172     | 913          | <b>1.15(1.00-1.32)</b> | 0.05        | 24135     | 946          | <b>1.05(0.92-1.20)</b> | 0.49        |
| ≥once /wk         | 30966     | 1184         | <b>1.12(0.98-1.28)</b> | 0.10        | 31071     | 1172         | <b>1.15(1.00-1.32)</b> | 0.05        | 30947     | 1154         | <b>1.01(0.89-1.15)</b> | 0.88        |
| Quartile 4        |           |              |                        |             |           |              |                        |             |           |              |                        |             |
| Processed meat    |           |              |                        |             |           |              |                        |             |           |              |                        |             |
| Never             | 8206      | 419          | 1.00 (REF)             |             | 8210      | 423          | 1.00 (REF)             |             | 7951      | 344          | 1.00 (REF)             |             |
| < once /wk        | 23931     | 1330         | <b>1.04(0.93-1.16)</b> | 0.13        | 23953     | 1346         | <b>1.05(0.94-1.17)</b> | 0.42        | 23985     | 1137         | <b>1.05(0.93-1.19)</b> | 0.42        |
| ≥once /wk         | 30881     | 1762         | <b>1.07(0.96-1.19)</b> | 0.22        | 30856     | 1761         | <b>1.07(0.96-1.19)</b> | 0.23        | 31098     | <b>1611</b>  | <b>1.15(1.02-1.30)</b> | <b>0.02</b> |
| P for interaction |           |              |                        | 0.67        |           |              |                        | 0.94        |           |              |                        | <b>0.03</b> |
| RERI              |           |              | 0.07(-0.33-0.46)       | 0.73        |           |              | 0.11(-0.26-0.49)       | 0.55        |           |              | 0.27(-0.03-0.57)       | 0.08        |
| Quartile 1        |           |              |                        |             |           |              |                        |             |           |              |                        |             |
| Beef              |           |              |                        |             |           |              |                        |             |           |              |                        |             |
| Never             | 8408      | 169          | 1.00 (REF)             |             | 8384      | 170          | 1.00 (REF)             |             | 8353      | 182          | 1.00 (REF)             |             |
| < once /wk        | 29368     | 561          | <b>0.90(0.76-1.07)</b> | 0.24        | 29378     | 554          | <b>0.88(0.74-1.05)</b> | 0.16        | 29414     | 636          | <b>0.94(0.80-1.11)</b> | 0.50        |
| ≥once /wk         | 25304     | 467          | <b>0.86(0.72-1.03)</b> | 0.11        | 25324     | <b>458</b>   | <b>0.83(0.69-1.00)</b> | <b>0.04</b> | 25284     | 577          | <b>0.99(0.83-1.17)</b> | 0.88        |
| Quartile 2        |           |              |                        |             |           |              |                        |             |           |              |                        |             |
| Beef              |           |              |                        |             |           |              |                        |             |           |              |                        |             |
| Never             | 8423      | 189          | 1.00 (REF)             |             | 8513      | 201          | 1.00 (REF)             |             | 8492      | 245          | 1.00 (REF)             |             |
| < once /wk        | 29269     | 781          | <b>1.11(0.95-1.31)</b> | 0.20        | 29268     | 788          | <b>1.07(0.91-1.25)</b> | 0.41        | 29156     | 877          | <b>0.98(0.85-1.13)</b> | 0.76        |
| ≥once /wk         | 25381     | 705          | <b>1.12(0.95-1.32)</b> | 0.16        | 25278     | 702          | <b>1.09(0.92-1.27)</b> | 0.32        | 25424     | 744          | <b>0.94(0.81-1.09)</b> | 0.39        |

|                   |       |             |                        |                  |                 |             |                         |             |       |                  |                        |                  |             |
|-------------------|-------|-------------|------------------------|------------------|-----------------|-------------|-------------------------|-------------|-------|------------------|------------------------|------------------|-------------|
| Quartile 3        |       |             |                        |                  |                 |             |                         |             |       |                  |                        |                  |             |
| Beef              |       |             |                        |                  |                 |             |                         |             |       |                  |                        |                  |             |
| Never             | 8614  | 291         | 1.00 (REF)             |                  | 8613            | 273         | 1.00 (REF)              |             | 8759  | 298              | 1.00 (REF)             |                  |             |
| < once /wk        | 28976 | 1089        | <b>1.05(0.92-1.19)</b> | 0.49             | 28949           | 1067        | <b>1.10(0.96-1.25)</b>  | 0.19        | 29082 | 1103             | <b>1.05(0.92-1.20)</b> | 0.44             |             |
| ≥once /wk         | 25420 | 970         | <b>1.06(0.92-1.21)</b> | 0.42             | 25454           | 987         | <b>1.15(1.00-1.31)</b>  | 0.05        | 25168 | 981              | <b>1.08(0.95-1.24)</b> | 0.23             |             |
| Quartile 4        |       |             |                        |                  |                 |             |                         |             |       |                  |                        |                  |             |
| Beef              |       |             |                        |                  |                 |             |                         |             |       |                  |                        |                  |             |
| Never             | 8978  | 439         | 1.00 (REF)             |                  | 8913            | 444         | 1.00 (REF)              |             | 8819  | 363              | 1.00 (REF)             |                  |             |
| < once /wk        | 28939 | 1592        | <b>1.06(0.95-1.18)</b> | 0.31             | 28957           | 1614        | <b>1.05(0.95-1.17)</b>  | 0.33        | 28900 | 1407             | <b>1.12(1.00-1.26)</b> | 0.05             |             |
| ≥once /wk         | 24993 | <b>1473</b> | <b>1.13(1.02-1.26)</b> | <b>0.02</b>      | 25042           | 1468        | <b>1.11(0.99-1.23)</b>  | 0.07        | 25222 | <b>1313</b>      | <b>1.19(1.05-1.34)</b> | <b>&lt;0.01</b>  |             |
| P for interaction |       |             |                        | 0.23             |                 |             |                         |             | 0.32  |                  |                        |                  |             |
| RERI              |       |             |                        | 0.46(0.13-0.80)  | <b>&lt;0.01</b> |             |                         |             |       | 0.42(0.11-0.75)  | <b>&lt;0.01</b>        | 0.37(0.07-0.68)  | <b>0.02</b> |
| Quartile 1        |       |             |                        |                  |                 |             |                         |             |       |                  |                        |                  |             |
| Lamb              |       |             |                        |                  |                 |             |                         |             |       |                  |                        |                  |             |
| Never             | 12913 | 235         | 1.00 (REF)             |                  | 12880           | 234         | 1.00 (REF)              |             | 13019 | 283              | 1.00 (REF)             |                  |             |
| < once /wk        | 35836 | 672         | <b>0.98(0.84-1.14)</b> | 0.81             | 35806           | 655         | <b>0.96(0.82-1.11)</b>  | 0.58        | 35784 | 767              | <b>0.94(0.82-1.08)</b> | 0.37             |             |
| ≥once /wk         | 14233 | 290         | <b>1.03(0.87-1.23)</b> | 0.71             | 14306           | 293         | <b>1.04(0.87-1.23)</b>  | 0.70        | 14151 | 346              | <b>1.06(0.90-1.24)</b> | 0.48             |             |
| Quartile 2        |       |             |                        |                  |                 |             |                         |             |       |                  |                        |                  |             |
| Lamb              |       |             |                        |                  |                 |             |                         |             |       |                  |                        |                  |             |
| Never             | 13026 | 301         | 1.00 (REF)             |                  | 13055           | 313         | 1.00 (REF)              |             | 12898 | 333              | 1.00 (REF)             |                  |             |
| < once /wk        | 35728 | 979         | <b>1.12(0.98-1.28)</b> | 0.09             | 35724           | 987         | <b>1.09(0.96-1.24)</b>  | 0.18        | 35779 | <b>1113</b>      | <b>1.15(1.02-1.31)</b> | <b>0.02</b>      |             |
| ≥once /wk         | 14231 | 391         | <b>1.09(0.94-1.27)</b> | 0.26             | 14182           | 388         | <b>1.05(0.909-1.22)</b> | 0.51        | 14261 | 413              | <b>1.03(0.89-1.20)</b> | 0.65             |             |
| Quartile 3        |       |             |                        |                  |                 |             |                         |             |       |                  |                        |                  |             |
| Lamb              |       |             |                        |                  |                 |             |                         |             |       |                  |                        |                  |             |
| Never             | 12985 | 452         | 1.00 (REF)             |                  | 12978           | 446         | 1.00 (REF)              |             | 13083 | 455              | 1.00 (REF)             |                  |             |
| < once /wk        | 35480 | 1314        | <b>1.03(0.92-1.14)</b> | 0.63             | 35477           | 1303        | <b>1.03(0.92-1.15)</b>  | 0.61        | 35451 | 1344             | <b>1.03(0.93-1.15)</b> | 0.59             |             |
| ≥once /wk         | 14383 | 577         | <b>1.07(0.95-1.22)</b> | 0.24             | 14419           | 574         | <b>1.08(0.95-1.23)</b>  | 0.23        | 14359 | 575              | <b>1.06(0.94-1.21)</b> | 0.33             |             |
| Quartile 4        |       |             |                        |                  |                 |             |                         |             |       |                  |                        |                  |             |
| Lamb              |       |             |                        |                  |                 |             |                         |             |       |                  |                        |                  |             |
| Never             | 12934 | 652         | 1.00 (REF)             |                  | 12945           | 647         | 1.00 (REF)              |             | 12858 | 569              | 1.00 (REF)             |                  |             |
| < once /wk        | 35195 | 2002        | <b>1.08(0.99-1.18)</b> | 0.09             | 35232           | <b>2022</b> | <b>1.10(1.01-1.21)</b>  | <b>0.03</b> | 35225 | 1743             | <b>1.09(0.99-1.19)</b> | 0.09             |             |
| ≥once /wk         | 14645 | 849         | <b>1.10(0.99-1.22)</b> | 0.08             | 14585           | <b>852</b>  | <b>1.12(1.01-1.24)</b>  | <b>0.04</b> | 14721 | <b>773</b>       | <b>1.14(1.02-1.27)</b> | <b>0.02</b>      |             |
| P for interaction |       |             |                        | 0.83             |                 |             |                         |             | 0.74  |                  |                        |                  |             |
| RERI              |       |             |                        | 0.20(-0.16-0.56) | 0.27            |             |                         |             |       | 0.24(-0.11-0.59) | 0.18                   | 0.19(-0.07-0.46) | 0.15        |
| Quartile 1        |       |             |                        |                  |                 |             |                         |             |       |                  |                        |                  |             |
| Pork              |       |             |                        |                  |                 |             |                         |             |       |                  |                        |                  |             |

|                   |       |             |                        |      |       |      |                        |                  |       |                  |                        |      |      |
|-------------------|-------|-------------|------------------------|------|-------|------|------------------------|------------------|-------|------------------|------------------------|------|------|
| Never             | 12481 | 231         | 1.00 (REF)             |      | 12473 | 228  | 1.00 (REF)             |                  | 12502 | 262              | 1.00 (REF)             |      |      |
| < once /wk        | 36038 | 662         | <b>0.95(0.81-1.10)</b> | 0.48 | 35989 | 647  | <b>0.94(0.81-1.10)</b> | 0.46             | 36175 | 793              | <b>0.99(0.86-1.14)</b> | 0.93 |      |
| ≥once /wk         | 14446 | 301         | <b>1.06(0.89-1.27)</b> | 0.48 | 14510 | 304  | <b>1.09(0.92-1.30)</b> | 0.34             | 14274 | 340              | <b>1.08(0.92-1.27)</b> | 0.35 |      |
| Quartile 2        |       |             |                        |      |       |      |                        |                  |       |                  |                        |      |      |
| Pork              |       |             |                        |      |       |      |                        |                  |       |                  |                        |      |      |
| Never             | 12524 | 311         | 1.00 (REF)             |      | 12575 | 322  | 1.00 (REF)             |                  | 12551 | 341              | 1.00 (REF)             |      |      |
| < once /wk        | 36092 | 983         | <b>1.03(0.91-1.17)</b> | 0.63 | 36061 | 985  | <b>1.01(0.89-1.14)</b> | 0.92             | 35879 | 1084             | <b>1.06(0.94-1.20)</b> | 0.35 |      |
| ≥once /wk         | 14367 | 379         | <b>0.99(0.85-1.15)</b> | 0.91 | 14317 | 383  | <b>0.97(0.83-1.13)</b> | 0.70             | 14531 | 434              | <b>1.03(0.89-1.19)</b> | 0.72 |      |
| Quartile 3        |       |             |                        |      |       |      |                        |                  |       |                  |                        |      |      |
| Pork              |       |             |                        |      |       |      |                        |                  |       |                  |                        |      |      |
| Never             | 12778 | 443         | 1.00 (REF)             |      | 12767 | 433  | 1.00 (REF)             |                  | 13004 | 472              | 1.00 (REF)             |      |      |
| < once /wk        | 35516 | 1361        | <b>1.05(0.95-1.18)</b> | 0.34 | 35567 | 1365 | <b>1.08(0.97-1.20)</b> | 0.18             | 35224 | 1357             | <b>1.00(0.90-1.11)</b> | 0.98 |      |
| ≥once /wk         | 14609 | 541         | <b>1.01(0.89-1.15)</b> | 0.89 | 14582 | 526  | <b>1.00(0.88-1.14)</b> | 1.00             | 14699 | 551              | <b>0.97(0.86-1.10)</b> | 0.68 |      |
| Quartile 4        |       |             |                        |      |       |      |                        |                  |       |                  |                        |      |      |
| Pork              |       |             |                        |      |       |      |                        |                  |       |                  |                        |      |      |
| Never             | 13361 | 672         | 1.00 (REF)             |      | 13329 | 674  | 1.00 (REF)             |                  | 13087 | 582              | 1.00 (REF)             |      |      |
| < once /wk        | 34768 | 1990        | <b>1.06(0.97-1.16)</b> | 0.17 | 34797 | 1999 | <b>1.07(0.98-1.16)</b> | 0.16             | 35136 | 1762             | <b>1.07(0.97-1.18)</b> | 0.16 |      |
| ≥once /wk         | 14656 | 838         | <b>1.06(0.96-1.18)</b> | 0.25 | 14669 | 846  | <b>1.07(0.97-1.19)</b> | 0.18             | 14574 | 734              | <b>1.06(0.95-1.19)</b> | 0.29 |      |
| P for interaction |       |             |                        | 0.47 |       |      |                        |                  | 0.45  | 0.67             |                        |      |      |
| RERI              |       |             | 0.14(-0.19-0.48)       | 0.40 |       |      |                        | 0.14(-0.22-0.50) | 0.44  | 0.07(-0.22-0.37) |                        |      | 0.63 |
| Quartile 1        |       |             |                        |      |       |      |                        |                  |       |                  |                        |      |      |
| Poultry           |       |             |                        |      |       |      |                        |                  |       |                  |                        |      |      |
| Never             | 3891  | 65          | 1.00 (REF)             |      | 3890  | 70   | 1.00 (REF)             |                  | 3857  | 75               | 1.00 (REF)             |      |      |
| < once /wk        | 6577  | 131         | <b>1.10(0.81-1.48)</b> | 0.55 | 6538  | 129  | <b>1.01(0.75-1.35)</b> | 0.97             | 6566  | 159              | <b>1.16(0.88-1.53)</b> | 0.29 |      |
| ≥once /wk         | 52740 | 1006        | <b>1.08(0.83-1.39)</b> | 0.57 | 52779 | 987  | <b>0.98(0.76-1.25)</b> | 0.84             | 52789 | 1165             | <b>1.07(0.85-1.36)</b> | 0.55 |      |
| Quartile 2        |       |             |                        |      |       |      |                        |                  |       |                  |                        |      |      |
| Poultry           |       |             |                        |      |       |      |                        |                  |       |                  |                        |      |      |
| Never             | 3916  | 75          | 1.00 (REF)             |      | 3925  | 80   | 1.00 (REF)             |                  | 3883  | 96               | 1.00 (REF)             |      |      |
| < once /wk        | 6423  | <b>183</b>  | <b>1.38(1.06-1.81)</b> | 0.02 | 6502  | 177  | <b>1.23(0.94-1.60)</b> | 0.13             | 6474  | 177              | <b>1.02(0.80-1.31)</b> | 0.86 |      |
| ≥once /wk         | 52876 | <b>1421</b> | <b>1.29(1.02-1.63)</b> | 0.03 | 52785 | 1442 | <b>1.25(0.99-1.56)</b> | 0.06             | 52819 | 1597             | <b>1.15(0.94-1.42)</b> | 0.18 |      |
| Quartile 3        |       |             |                        |      |       |      |                        |                  |       |                  |                        |      |      |
| Poultry           |       |             |                        |      |       |      |                        |                  |       |                  |                        |      |      |
| Never             | 3828  | 127         | 1.00 (REF)             |      | 3835  | 120  | 1.00 (REF)             |                  | 4045  | 136              | 1.00 (REF)             |      |      |
| < once /wk        | 6549  | 252         | <b>1.08(0.87-1.34)</b> | 0.48 | 6501  | 255  | <b>1.17(0.94-1.46)</b> | 0.16             | 6452  | 261              | <b>1.14(0.92-1.40)</b> | 0.23 |      |
| ≥once /wk         | 52762 | 1976        | <b>1.08(0.90-1.29)</b> | 0.43 | 52812 | 1957 | <b>1.12(0.93-1.35)</b> | 0.25             | 52684 | 1988             | <b>1.07(0.90-1.28)</b> | 0.45 |      |
| Quartile 4        |       |             |                        |      |       |      |                        |                  |       |                  |                        |      |      |

|                   |       |             |                        |             |       |      |                        |      |       |             |                        |                 |
|-------------------|-------|-------------|------------------------|-------------|-------|------|------------------------|------|-------|-------------|------------------------|-----------------|
| Poultry           |       |             |                        |             |       |      |                        |      |       |             |                        |                 |
| Never             | 4021  | 205         | 1.00 (REF)             |             | 4006  | 202  | 1.00 (REF)             |      | 3871  | 165         | 1.00 (REF)             |                 |
| < once /wk        | 6405  | 351         | <b>1.00(0.84-1.19)</b> | 0.97        | 6413  | 356  | <b>1.03(0.87-1.23)</b> | 0.74 | 6462  | 320         | <b>1.08(0.89-1.30)</b> | 0.43            |
| ≥once /wk         | 52687 | 2963        | <b>1.05(0.91-1.22)</b> | 0.47        | 52689 | 2980 | <b>1.08(0.93-1.24)</b> | 0.32 | 52773 | 2616        | <b>1.10(0.94-1.29)</b> | 0.23            |
| P for interaction |       |             |                        | 0.50        |       |      |                        | 0.63 |       |             |                        | 0.75            |
| RERI              |       |             | 0.09(-0.50-0.67)       | 0.78        |       |      | 0.21(-0.27-0.71)       | 0.39 |       |             | 0.15(-0.23-0.54)       | 0.44            |
| Quartile 1        |       |             |                        |             |       |      |                        |      |       |             |                        |                 |
| Oily fish         |       |             |                        |             |       |      |                        |      |       |             |                        |                 |
| Never             | 6710  | 123         | 1.00 (REF)             |             | 6689  | 122  | 1.00 (REF)             |      | 6789  | 143         | 1.00 (REF)             |                 |
| < once /wk        | 20094 | 373         | <b>0.97(0.79-1.19)</b> | 0.74        | 20198 | 369  | <b>0.95(0.77-1.16)</b> | 0.60 | 20098 | 475         | <b>1.06(0.88-1.28)</b> | 0.54            |
| ≥once /wk         | 36269 | 706         | <b>0.98(0.81-1.20)</b> | 0.86        | 36187 | 695  | <b>0.96(0.79-1.16)</b> | 0.66 | 36157 | 778         | <b>0.94(0.78-1.12)</b> | 0.48            |
| Quartile 2        |       |             |                        |             |       |      |                        |      |       |             |                        |                 |
| Oily fish         |       |             |                        |             |       |      |                        |      |       |             |                        |                 |
| Never             | 6778  | 143         | 1.00 (REF)             |             | 6789  | 149  | 1.00 (REF)             |      | 6637  | 152         | 1.00 (REF)             |                 |
| < once /wk        | 20184 | <b>549</b>  | <b>1.21(1.00-1.46)</b> | <b>0.04</b> | 20078 | 550  | <b>1.18(0.98-1.42)</b> | 0.07 | 20288 | <b>589</b>  | <b>1.23(1.03-1.48)</b> | <b>0.02</b>     |
| ≥once /wk         | 36040 | 981         | <b>1.16(0.97-1.39)</b> | 0.10        | 36113 | 994  | <b>1.15(0.96-1.37)</b> | 0.13 | 36056 | <b>1124</b> | <b>1.29(1.09-1.54)</b> | <b>&lt;0.01</b> |
| Quartile 3        |       |             |                        |             |       |      |                        |      |       |             |                        |                 |
| Oily fish         |       |             |                        |             |       |      |                        |      |       |             |                        |                 |
| Never             | 6774  | 220         | 1.00 (REF)             |             | 6823  | 225  | 1.00 (REF)             |      | 6952  | 234         | 1.00 (REF)             |                 |
| < once /wk        | 20175 | 764         | <b>1.14(0.98-1.32)</b> | 0.10        | 20181 | 772  | <b>1.13(0.98-1.32)</b> | 0.10 | 20020 | 752         | <b>1.06(0.91-1.23)</b> | 0.46            |
| ≥once /wk         | 35975 | 1364        | <b>1.11(0.96-1.29)</b> | 0.15        | 35953 | 1328 | <b>1.07(0.93-1.23)</b> | 0.37 | 35988 | 1396        | <b>1.06(0.92-1.22)</b> | 0.42            |
| Quartile 4        |       |             |                        |             |       |      |                        |      |       |             |                        |                 |
| Oily fish         |       |             |                        |             |       |      |                        |      |       |             |                        |                 |
| Never             | 6845  | 348         | 1.00 (REF)             |             | 6806  | 338  | 1.00 (REF)             |      | 6729  | 305         | 1.00 (REF)             |                 |
| < once /wk        | 20082 | 1108        | <b>1.05(0.93-1.18)</b> | 0.48        | 20078 | 1103 | <b>1.07(0.94-1.20)</b> | 0.31 | 20129 | 978         | <b>1.04(0.92-1.19)</b> | 0.53            |
| ≥once /wk         | 35935 | <b>2049</b> | <b>1.05(0.94-1.18)</b> | 0.38        | 35966 | 2083 | <b>1.09(0.97-1.23)</b> | 0.14 | 36018 | 1802        | <b>1.04(0.92-1.18)</b> | 0.50            |
| P for interaction |       |             |                        | 0.86        |       |      |                        | 0.61 |       |             |                        | 0.26            |
| RERI              |       |             | 0.16(-0.15-0.48)       | 0.31        |       |      | 0.28(-0.04-0.61)       | 0.08 |       |             | 0.12(-0.16-0.40)       | 0.40            |
| Quartile 1        |       |             |                        |             |       |      |                        |      |       |             |                        |                 |
| Non-oily fish     |       |             |                        |             |       |      |                        |      |       |             |                        |                 |
| Never             | 2994  | 58          | 1.00 (REF)             |             | 2987  | 61   | 1.00 (REF)             |      | 3060  | 56          | 1.00 (REF)             |                 |
| < once /wk        | 17689 | 318         | <b>0.89(0.67-1.18)</b> | 0.41        | 17671 | 314  | <b>0.83(0.63-1.09)</b> | 0.18 | 17715 | 395         | <b>1.16(0.87-1.53)</b> | 0.31            |
| ≥once /wk         | 42400 | 827         | <b>0.95(0.73-1.24)</b> | 0.71        | 42425 | 812  | <b>0.87(0.67-1.14)</b> | 0.31 | 42289 | 947         | <b>1.15(0.88-1.51)</b> | 0.30            |
| Quartile 2        |       |             |                        |             |       |      |                        |      |       |             |                        |                 |
| Non-oily fish     |       |             |                        |             |       |      |                        |      |       |             |                        |                 |
| Never             | 3074  | 62          | 1.00 (REF)             |             | 3090  | 62   | 1.00 (REF)             |      | 2960  | 76          | 1.00 (REF)             |                 |

|                   |       |            |                        |             |       |            |                        |             |       |      |                        |      |
|-------------------|-------|------------|------------------------|-------------|-------|------------|------------------------|-------------|-------|------|------------------------|------|
| < once /wk        | 17818 | 480        | <b>1.24(0.95-1.62)</b> | 0.11        | 17482 | 491        | <b>1.29(0.99-1.68)</b> | 0.06        | 18067 | 533  | <b>1.09(0.86-1.39)</b> | 0.48 |
| ≥once /wk         | 42163 | 1133       | <b>1.21(0.93-1.57)</b> | 0.15        | 42105 | 1141       | <b>1.25(0.96-1.62)</b> | 0.09        | 42013 | 1257 | <b>1.09(0.86-1.37)</b> | 0.49 |
| Quartile 3        |       |            |                        |             |       |            |                        |             |       |      |                        |      |
| Non-oily fish     |       |            |                        |             |       |            |                        |             |       |      |                        |      |
| Never             | 3097  | 89         | 1.00 (REF)             |             | 3144  | 92         | 1.00 (REF)             |             | 3210  | 99   | 1.00 (REF)             |      |
| < once /wk        | 18107 | <b>709</b> | <b>1.31(1.05-1.63)</b> | <b>0.02</b> | 18082 | <b>686</b> | <b>1.25(1.01-1.56)</b> | <b>0.04</b> | 17867 | 655  | <b>1.13(0.92-1.40)</b> | 0.25 |
| ≥once /wk         | 41786 | 1554       | <b>1.23(0.99-1.53)</b> | 0.06        | 41803 | 1552       | <b>1.21(0.98-1.50)</b> | 0.08        | 41942 | 1629 | <b>1.18(0.97-1.45)</b> | 0.10 |
| Quartile 4        |       |            |                        |             |       |            |                        |             |       |      |                        |      |
| Non-oily fish     |       |            |                        |             |       |            |                        |             |       |      |                        |      |
| Never             | 3216  | 156        | 1.00 (REF)             |             | 3160  | 150        | 1.00 (REF)             |             | 3151  | 134  | 1.00 (REF)             |      |
| < once /wk        | 17932 | 975        | <b>1.07(0.90-1.26)</b> | 0.45        | 17951 | 991        | <b>1.10(0.93-1.31)</b> | 0.27        | 17897 | 899  | <b>1.13(0.94-1.35)</b> | 0.20 |
| ≥once /wk         | 41712 | 2366       | <b>1.08(0.92-1.27)</b> | 0.34        | 41728 | 2375       | <b>1.11(0.94-1.31)</b> | 0.23        | 41817 | 2047 | <b>1.07(0.90-1.28)</b> | 0.42 |
| P for interaction |       |            |                        | 0.32        |       |            |                        | 0.32        |       |      |                        | 0.73 |
| RERI              |       |            | 0.28(-0.23-0.80)       | 0.28        |       |            | 0.40(-0.06-0.86)       | 0.09        |       |      | 0.02(-0.52-0.55)       | 0.94 |
| Quartile 1        |       |            |                        |             |       |            |                        |             |       |      |                        |      |
| Cheese            |       |            |                        |             |       |            |                        |             |       |      |                        |      |
| Never             | 1552  | 28         | 1.00 (REF)             |             | 1551  | 27         | 1.00 (REF)             |             | 1534  | 34   | 1.00 (REF)             |      |
| < once /wk        | 11736 | 213        | <b>1.01(0.68-1.51)</b> | 0.94        | 11762 | 212        | <b>1.03(0.69-1.55)</b> | 0.87        | 11819 | 253  | <b>0.94(0.66-1.35)</b> | 0.75 |
| ≥once /wk         | 48464 | 940        | <b>1.10(0.75-1.60)</b> | 0.64        | 48415 | 923        | <b>1.10(0.75-1.62)</b> | 0.62        | 48353 | 1085 | <b>1.00(0.71-1.40)</b> | 0.98 |
| Quartile 2        |       |            |                        |             |       |            |                        |             |       |      |                        |      |
| Cheese            |       |            |                        |             |       |            |                        |             |       |      |                        |      |
| Never             | 1541  | 40         | 1.00 (REF)             |             | 1553  | 44         | 1.00 (REF)             |             | 1588  | 35   | 1.00 (REF)             |      |
| < once /wk        | 11972 | 317        | <b>0.95(0.69-1.33)</b> | 0.78        | 11992 | 333        | <b>0.93(0.68-1.28)</b> | 0.68        | 11985 | 332  | <b>1.22(0.86-1.72)</b> | 0.27 |
| ≥once /wk         | 48127 | 1286       | <b>0.97(0.71-1.33)</b> | 0.85        | 48120 | 1285       | <b>0.91(0.67-1.23)</b> | 0.55        | 48023 | 1464 | <b>1.34(0.96-1.87)</b> | 0.09 |
| Quartile 3        |       |            |                        |             |       |            |                        |             |       |      |                        |      |
| Cheese            |       |            |                        |             |       |            |                        |             |       |      |                        |      |
| Never             | 1652  | 53         | 1.00 (REF)             |             | 1652  | 49         | 1.00 (REF)             |             | 1593  | 66   | 1.00 (REF)             |      |
| < once /wk        | 12075 | 430        | <b>1.08(0.81-1.44)</b> | 0.59        | 12103 | 399        | <b>1.09(0.81-1.46)</b> | 0.59        | 12086 | 468  | <b>0.91(0.70-1.18)</b> | 0.48 |
| ≥once /wk         | 47848 | 1812       | <b>1.15(0.88-1.52)</b> | 0.31        | 47813 | 1827       | <b>1.27(0.95-1.69)</b> | 0.10        | 47954 | 1796 | <b>0.87(0.68-1.12)</b> | 0.28 |
| Quartile 4        |       |            |                        |             |       |            |                        |             |       |      |                        |      |
| Cheese            |       |            |                        |             |       |            |                        |             |       |      |                        |      |
| Never             | 1708  | 88         | 1.00 (REF)             |             | 1697  | 89         | 1.00 (REF)             |             | 1738  | 74   | 1.00 (REF)             |      |
| < once /wk        | 12673 | 675        | <b>1.00(0.80-1.25)</b> | 0.98        | 12599 | 691        | <b>1.01(0.81-1.26)</b> | 0.93        | 12566 | 582  | <b>1.05(0.82-1.34)</b> | 0.70 |
| ≥once /wk         | 47002 | 2666       | <b>1.04(0.84-1.29)</b> | 0.71        | 47093 | 2669       | <b>1.02(0.82-1.26)</b> | 0.89        | 47111 | 2359 | <b>1.13(0.89-1.42)</b> | 0.32 |
| P for interaction |       |            |                        | 0.98        |       |            |                        | 0.56        |       |      |                        | 0.46 |
| RERI              |       |            | 0.07(-0.75-0.89)       | 0.86        |       |            | 0.01(-0.85-0.87)       | 0.98        |       |      | 0.23(-0.34-0.81)       | 0.43 |

|                    |       |      |                        |                  |       |            |                        |             |       |                  |                        |                  |      |
|--------------------|-------|------|------------------------|------------------|-------|------------|------------------------|-------------|-------|------------------|------------------------|------------------|------|
| Quartile 1         |       |      |                        |                  |       |            |                        |             |       |                  |                        |                  |      |
| Cooked vegetable   |       |      |                        |                  |       |            |                        |             |       |                  |                        |                  |      |
| < 2 servings/d     | 10113 | 181  | 1.00 (REF)             |                  | 10096 | 175        | 1.00 (REF)             |             | 10291 | 229              | 1.00 (REF)             |                  |      |
| 2.0-2.9 servings/d | 21945 | 425  | <b>1.06(0.89-1.27)</b> | 0.50             | 21994 | 419        | <b>1.07(0.90-1.28)</b> | 0.44        | 21658 | 501              | <b>1.01(0.86-1.18)</b> | 0.90             |      |
| 3.0-3.9 servings/d | 18234 | 357  | <b>1.07(0.89-1.28)</b> | 0.50             | 18127 | 356        | <b>1.10(0.92-1.32)</b> | 0.30        | 18175 | 378              | <b>0.91(0.77-1.08)</b> | 0.27             |      |
| ≥4 servings/d      | 12504 | 235  | <b>1.03(0.85-1.25)</b> | 0.77             | 12568 | 231        | <b>1.04(0.85-1.27)</b> | 0.71        | 12629 | 282              | <b>0.98(0.82-1.18)</b> | 0.86             |      |
| Quartile 2         |       |      |                        |                  |       |            |                        |             |       |                  |                        |                  |      |
| Cooked vegetable   |       |      |                        |                  |       |            |                        |             |       |                  |                        |                  |      |
| < 2 servings/d     | 10386 | 260  | 1.00 (REF)             |                  | 10444 | 282        | 1.00 (REF)             |             | 10204 | 285              | 1.00 (REF)             |                  |      |
| 2.0-2.9 servings/d | 21547 | 584  | <b>1.02(0.88-1.19)</b> | 0.75             | 21531 | 576        | <b>0.94(0.82-1.09)</b> | 0.42        | 21622 | 636              | <b>1.03(0.89-1.18)</b> | 0.73             |      |
| 3.0-3.9 servings/d | 18028 | 475  | <b>1.00(0.86-1.17)</b> | 0.98             | 18007 | 478        | <b>0.94(0.81-1.09)</b> | 0.41        | 18011 | 544              | <b>1.04(0.90-1.20)</b> | 0.61             |      |
| ≥4 servings/d      | 12784 | 345  | <b>1.03(0.87-1.21)</b> | 0.75             | 12751 | 350        | <b>0.97(0.83-1.14)</b> | 0.70        | 12897 | 397              | <b>1.06(0.91-1.24)</b> | 0.45             |      |
| Quartile 3         |       |      |                        |                  |       |            |                        |             |       |                  |                        |                  |      |
| Cooked vegetable   |       |      |                        |                  |       |            |                        |             |       |                  |                        |                  |      |
| < 2 servings/d     | 10365 | 397  | 1.00 (REF)             |                  | 10367 | 380        | 1.00 (REF)             |             | 10419 | 365              | 1.00 (REF)             |                  |      |
| 2.0-2.9 servings/d | 21645 | 817  | <b>0.97(0.86-1.09)</b> | 0.60             | 21584 | 808        | <b>1.00(0.89-1.14)</b> | 0.95        | 21796 | 878              | <b>1.09(0.97-1.24)</b> | 0.15             |      |
| 3.0-3.9 servings/d | 17675 | 660  | <b>0.95(0.84-1.08)</b> | 0.42             | 17779 | 666        | <b>1.00(0.88-1.14)</b> | 0.99        | 17698 | 656              | <b>1.00(0.88-1.14)</b> | 0.99             |      |
| ≥4 servings/d      | 12978 | 469  | <b>0.92(0.80-1.06)</b> | 0.25             | 12946 | 466        | <b>0.97(0.84-1.11)</b> | 0.62        | 12787 | 468              | <b>1.00(0.87-1.15)</b> | 0.98             |      |
| Quartile 4         |       |      |                        |                  |       |            |                        |             |       |                  |                        |                  |      |
| Cooked vegetable   |       |      |                        |                  |       |            |                        |             |       |                  |                        |                  |      |
| < 2 servings/d     | 10615 | 550  | 1.00 (REF)             |                  | 10572 | 551        | 1.00 (REF)             |             | 10565 | 509              | 1.00 (REF)             |                  |      |
| 2.0-2.9 servings/d | 20936 | 1227 | <b>1.08(0.97-1.19)</b> | 0.15             | 20964 | 1250       | <b>1.09(0.99-1.21)</b> | 0.09        | 20997 | 1038             | <b>1.00(0.89-1.11)</b> | 0.93             |      |
| 3.0-3.9 servings/d | 17799 | 963  | <b>0.98(0.88-1.09)</b> | 0.71             | 17823 | 955        | <b>0.96(0.87-1.07)</b> | 0.50        | 17852 | 877              | <b>0.98(0.87-1.09)</b> | 0.66             |      |
| ≥4 servings/d      | 13187 | 750  | <b>1.06(0.95-1.19)</b> | 0.31             | 13188 | 752        | <b>1.05(0.94-1.18)</b> | 0.35        | 13140 | 652              | <b>1.00(0.89-1.13)</b> | 1.00             |      |
| P for interaction  |       |      |                        | 0.88             |       |            |                        |             | 0.72  |                  |                        |                  |      |
| RERI               |       |      |                        | 0.20(-0.17-0.57) | 0.29  |            |                        |             |       | 0.18(-0.21-0.57) | 0.37                   | 0.03(-0.26-0.33) | 0.83 |
| Quartile 1         |       |      |                        |                  |       |            |                        |             |       |                  |                        |                  |      |
| Raw vegetable      |       |      |                        |                  |       |            |                        |             |       |                  |                        |                  |      |
| < 2 servings/d     | 24348 | 461  | 1.00 (REF)             |                  | 24378 | 461        | 1.00 (REF)             |             | 24379 | 563              | 1.00 (REF)             |                  |      |
| 2.0-2.9 servings/d | 16089 | 308  | <b>1.02(0.88-1.18)</b> | 0.81             | 15998 | 298        | <b>0.99(0.86-1.15)</b> | 0.91        | 15918 | 331              | <b>0.90(0.79-1.03)</b> | 0.14             |      |
| 3.0-3.9 servings/d | 10064 | 209  | <b>1.10(0.93-1.30)</b> | 0.26             | 10071 | 195        | <b>1.03(0.87-1.21)</b> | 0.77        | 9974  | 236              | <b>1.03(0.88-1.20)</b> | 0.71             |      |
| ≥4 servings/d      | 12240 | 219  | <b>0.96(0.81-1.13)</b> | 0.61             | 12277 | 228        | <b>1.00(0.85-1.17)</b> | 0.97        | 12405 | 258              | <b>0.90(0.78-1.05)</b> | 0.19             |      |
| Quartile 2         |       |      |                        |                  |       |            |                        |             |       |                  |                        |                  |      |
| Raw vegetable      |       |      |                        |                  |       |            |                        |             |       |                  |                        |                  |      |
| < 2 servings/d     | 24324 | 682  | 1.00 (REF)             |                  | 24254 | 686        | 1.00 (REF)             |             | 24117 | 713              | 1.00 (REF)             |                  |      |
| 2.0-2.9 servings/d | 15756 | 398  | <b>0.89(0.79-1.01)</b> | 0.07             | 15817 | <b>396</b> | <b>0.88(0.78-0.99)</b> | <b>0.04</b> | 15918 | 478              | <b>1.01(0.90-1.14)</b> | 0.83             |      |
| 3.0-3.9 servings/d | 10062 | 265  | <b>0.93(0.81-1.08)</b> | 0.34             | 10078 | 290        | <b>1.01(0.88-1.16)</b> | 0.87        | 10088 | 295              | <b>0.98(0.86-1.13)</b> | 0.78             |      |

|                    |       |            |                        |             |       |            |                        |                   |       |            |                        |                 |                   |      |
|--------------------|-------|------------|------------------------|-------------|-------|------------|------------------------|-------------------|-------|------------|------------------------|-----------------|-------------------|------|
| ≥4 servings/d      | 12507 | 314        | <b>0.89(0.77-1.02)</b> | 0.08        | 12506 | <b>308</b> | <b>0.86(0.75-0.99)</b> | <b>0.03</b>       | 12537 | 370        | <b>0.99(0.87-1.13)</b> | 0.89            |                   |      |
| Quartile 3         |       |            |                        |             |       |            |                        |                   |       |            |                        |                 |                   |      |
| Raw vegetable      |       |            |                        |             |       |            |                        |                   |       |            |                        |                 |                   |      |
| < 2 servings/d     | 24203 | 927        | 1.00 (REF)             |             | 24309 | 930        | 1.00 (REF)             |                   | 24267 | 930        | 1.00 (REF)             |                 |                   |      |
| 2.0-2.9 servings/d | 15773 | 590        | <b>0.98(0.88-1.09)</b> | 0.71        | 15737 | 589        | <b>0.98(0.89-1.09)</b> | 0.77              | 15779 | 606        | <b>1.00(0.90-1.10)</b> | 0.93            |                   |      |
| 3.0-3.9 servings/d | 10111 | 373        | <b>0.97(0.86-1.09)</b> | 0.60        | 10188 | 363        | <b>0.94(0.83-1.06)</b> | 0.31              | 10082 | 403        | <b>1.04(0.93-1.17)</b> | 0.47            |                   |      |
| ≥4 servings/d      | 12529 | 453        | <b>0.96(0.86-1.07)</b> | 0.86        | 12384 | 435        | <b>0.94(0.84-1.05)</b> | 0.28              | 12516 | 435        | <b>0.92(0.82-1.03)</b> | 0.17            |                   |      |
| Quartile 4         |       |            |                        |             |       |            |                        |                   |       |            |                        |                 |                   |      |
| Raw vegetable      |       |            |                        |             |       |            |                        |                   |       |            |                        |                 |                   |      |
| < 2 servings/d     | 24173 | 1381       | 1.00 (REF)             |             | 24107 | 1374       | 1.00 (REF)             |                   | 24285 | 1245       | 1.00 (REF)             |                 |                   |      |
| 2.0-2.9 servings/d | 15671 | 896        | <b>0.99(0.91-1.08)</b> | 0.87        | 15737 | 90         | <b>1.00(0.92-1.09)</b> | 0.91              | 15674 | 777        | <b>0.97(0.88-1.06)</b> | 0.44            |                   |      |
| 3.0-3.9 servings/d | 10058 | 557        | <b>0.97(0.88-1.07)</b> | 0.54        | 9958  | 556        | <b>0.98(0.89-1.08)</b> | 0.65              | 10151 | 470        | <b>0.90(0.81-1.00)</b> | 0.05            |                   |      |
| ≥4 servings/d      | 12575 | 661        | <b>0.93(0.85-1.02)</b> | 0.15        | 12684 | 676        | <b>0.94(0.86-1.04)</b> | 0.23              | 12393 | 584        | <b>0.93(0.84-1.03)</b> | 0.17            |                   |      |
| P for interaction  |       |            |                        | 0.83        |       |            |                        |                   | 0.62  |            |                        |                 |                   |      |
| RERI               |       |            | -0.16(-0.49-0.28)      | 0.36        |       |            |                        | -0.15(-0.50-0.20) | 0.40  |            |                        |                 | -0.06(-0.34-0.21) | 0.66 |
| Quartile 1         |       |            |                        |             |       |            |                        |                   |       |            |                        |                 |                   |      |
| Fresh fruit        |       |            |                        |             |       |            |                        |                   |       |            |                        |                 |                   |      |
| < 2 servings/d     | 18666 | 368        | 1.00 (REF)             |             | 18768 | 360        | 1.00 (REF)             |                   | 18668 | 418        | 1.00 (REF)             |                 |                   |      |
| 2.0-2.9 servings/d | 18563 | 359        | <b>0.97(0.84-1.12)</b> | 0.66        | 18573 | 355        | <b>0.97(0.84-1.13)</b> | 0.73              | 18501 | 421        | <b>1.00(0.87-1.14)</b> | 0.94            |                   |      |
| 3.0-3.9 servings/d | 14399 | 280        | <b>0.96(0.82-1.13)</b> | 0.64        | 14341 | 280        | <b>0.98(0.84-1.15)</b> | 0.80              | 14442 | 324        | <b>0.96(0.83-1.12)</b> | 0.63            |                   |      |
| ≥4 servings/d      | 11499 | 195        | <b>0.84(0.70-1.00)</b> | 0.06        | 11441 | 192        | <b>0.84(0.70-1.00)</b> | 0.05              | 11493 | 232        | <b>0.87(0.74-1.03)</b> | 0.10            |                   |      |
| Quartile 2         |       |            |                        |             |       |            |                        |                   |       |            |                        |                 |                   |      |
| Fresh fruit        |       |            |                        |             |       |            |                        |                   |       |            |                        |                 |                   |      |
| < 2 servings/d     | 18607 | 503        | 1.00 (REF)             |             | 18487 | 531        | 1.00 (REF)             |                   | 18503 | 540        | 1.00 (REF)             |                 |                   |      |
| 2.0-2.9 servings/d | 18589 | 500        | <b>0.95(0.84-1.08)</b> | 0.42        | 18571 | 493        | <b>0.89(0.78-1.00)</b> | 0.06              | 18474 | 543        | <b>0.99(0.88-1.12)</b> | 0.85            |                   |      |
| 3.0-3.9 servings/d | 14625 | 396        | <b>0.94(0.82-1.07)</b> | 0.35        | 14722 | 391        | <b>0.87(0.76-1.00)</b> | 0.04              | 14599 | 452        | <b>1.05(0.93-1.19)</b> | 0.45            |                   |      |
| ≥4 servings/d      | 11288 | <b>275</b> | <b>0.83(0.72-0.97)</b> | <b>0.02</b> | 11325 | <b>277</b> | <b>0.79(0.68-0.92)</b> | <b>&lt;0.01</b>   | 11501 | 334        | <b>0.97(0.85-1.12)</b> | 0.69            |                   |      |
| Quartile 3         |       |            |                        |             |       |            |                        |                   |       |            |                        |                 |                   |      |
| Fresh fruit        |       |            |                        |             |       |            |                        |                   |       |            |                        |                 |                   |      |
| < 2 servings/d     | 18680 | 713        | 1.00 (REF)             |             | 18709 | 686        | 1.00 (REF)             |                   | 18682 | 749        | 1.00 (REF)             |                 |                   |      |
| 2.0-2.9 servings/d | 18394 | 687        | <b>0.97(0.87-1.07)</b> | 0.52        | 18395 | 693        | <b>1.01(0.91-1.13)</b> | 0.79              | 18493 | <b>673</b> | <b>0.86(0.78-0.96)</b> | <b>0.01</b>     |                   |      |
| 3.0-3.9 servings/d | 14491 | 569        | <b>1.01(0.90-1.13)</b> | 0.86        | 14457 | 572        | <b>1.06(0.95-1.19)</b> | 0.31              | 14495 | 577        | <b>0.93(0.83-1.04)</b> | 0.19            |                   |      |
| ≥4 servings/d      | 11476 | <b>383</b> | <b>0.86(0.75-0.97)</b> | <b>0.02</b> | 11497 | 380        | <b>0.88(0.78-1.00)</b> | 0.06              | 11409 | <b>380</b> | <b>0.78(0.68-0.88)</b> | <b>&lt;0.01</b> |                   |      |
| Quartile 4         |       |            |                        |             |       |            |                        |                   |       |            |                        |                 |                   |      |
| Fresh fruit        |       |            |                        |             |       |            |                        |                   |       |            |                        |                 |                   |      |
| < 2 servings/d     | 18643 | 1068       | 1.00 (REF)             |             | 18632 | 1075       | 1.00 (REF)             |                   | 18743 | 945        | 1.00 (REF)             |                 |                   |      |
| 2.0-2.9 servings/d | 18295 | 1048       | <b>0.97(0.89-1.06)</b> | 0.49        | 18302 | 1053       | <b>0.97(0.89-1.06)</b> | 0.47              | 18373 | 957        | <b>1.02(0.93-1.12)</b> | 0.66            |                   |      |

|                    |       |            |                        |                 |       |            |                        |             |       |            |                        |                 |
|--------------------|-------|------------|------------------------|-----------------|-------|------------|------------------------|-------------|-------|------------|------------------------|-----------------|
| 3.0-3.9 servings/d | 14438 | 794        | <b>0.92(0.84-1.01)</b> | 0.10            | 14433 | 796        | <b>0.92(0.84-1.01)</b> | 0.09        | 14417 | 686        | <b>0.92(0.84-1.02)</b> | 0.12            |
| ≥4 servings/d      | 11602 | <b>596</b> | <b>0.87(0.78-0.96)</b> | <b>&lt;0.01</b> | 11602 | <b>600</b> | <b>0.87(0.78-0.96)</b> | <b>0.01</b> | 11462 | <b>503</b> | <b>0.85(0.76-0.95)</b> | <b>&lt;0.01</b> |
| P for interaction  |       |            |                        | 1.00            |       |            |                        | 0.81        |       |            |                        | 0.34            |
| RERI               |       |            | -0.23(-0.55-0.09)      | 0.15            |       |            | -0.26(-0.61-0.08)      | 0.14        |       |            | -0.24(-0.52-0.03)      | 0.08            |
| Quartile 1         |       |            |                        |                 |       |            |                        |             |       |            |                        |                 |
| Dried fruit        |       |            |                        |                 |       |            |                        |             |       |            |                        |                 |
| < 2 servings/d     | 50420 | 966        | 1.00 (REF)             |                 | 50410 | 955        | 1.00 (REF)             |             | 50485 | 1116       | 1.00 (REF)             |                 |
| 2.0-2.9 servings/d | 5610  | 93         | <b>0.85(0.69-1.05)</b> | 0.14            | 5628  | 93         | <b>0.85(0.69-1.05)</b> | 0.14        | 5501  | 112        | <b>0.91(0.75-1.10)</b> | 0.33            |
| 3.0-3.9 servings/d | 2812  | 52         | <b>0.93(0.71-1.24)</b> | 0.63            | 2797  | 56         | <b>1.01(0.77-1.33)</b> | 0.92        | 2784  | 61         | <b>0.96(0.74-1.24)</b> | 0.75            |
| ≥4 servings/d      | 3826  | 77         | <b>1.03(0.81-1.30)</b> | 0.83            | 3831  | 70         | <b>0.93(0.73-1.18)</b> | 0.54        | 3868  | 89         | <b>1.04(0.84-1.29)</b> | 0.73            |
| Quartile 2         |       |            |                        |                 |       |            |                        |             |       |            |                        |                 |
| Dried fruit        |       |            |                        |                 |       |            |                        |             |       |            |                        |                 |
| < 2 servings/d     | 50702 | 1348       | 1.00 (REF)             |                 | 50623 | 1357       | 1.00 (REF)             |             | 50525 | 1524       | 1.00 (REF)             |                 |
| 2.0-2.9 servings/d | 5444  | 141        | <b>0.95(0.79-1.13)</b> | 0.53            | 5467  | 142        | <b>0.95(0.80-1.13)</b> | 0.55        | 5543  | 145        | <b>0.85(0.71-1.00)</b> | 0.06            |
| 3.0-3.9 servings/d | 2681  | 79         | <b>1.07(0.85-1.34)</b> | 0.56            | 2692  | 74         | <b>1.00(0.79-1.26)</b> | 0.99        | 2752  | 81         | <b>0.96(0.76-1.20)</b> | 0.70            |
| ≥4 servings/d      | 3815  | 99         | <b>0.94(0.77-1.16)</b> | 0.56            | 3852  | 114        | <b>1.08(0.89-1.31)</b> | 0.42        | 3766  | 109        | <b>0.94(0.77-1.14)</b> | 0.50            |
| Quartile 3         |       |            |                        |                 |       |            |                        |             |       |            |                        |                 |
| Dried fruit        |       |            |                        |                 |       |            |                        |             |       |            |                        |                 |
| < 2 servings/d     | 50524 | 1930       | 1.00 (REF)             |                 | 50613 | 1913       | 1.00 (REF)             |             | 50520 | 1937       | 1.00 (REF)             |                 |
| 2.0-2.9 servings/d | 5500  | 188        | <b>0.89(0.76-1.03)</b> | 0.12            | 5435  | 184        | <b>0.89(0.76-1.03)</b> | 0.12        | 5526  | 201        | <b>0.92(0.80-1.07)</b> | 0.28            |
| 3.0-3.9 servings/d | 2741  | 82         | <b>0.78(0.63-0.98)</b> | 0.03            | 2763  | 87         | <b>0.83(0.67-1.03)</b> | 0.09        | 2728  | <b>87</b>  | <b>0.80(0.64-0.99)</b> | <b>0.04</b>     |
| ≥4 servings/d      | 3801  | 137        | <b>0.94(0.79-1.12)</b> | 0.50            | 3759  | 130        | <b>0.91(0.76-1.09)</b> | 0.30        | 3844  | 139        | <b>0.92(0.77-1.09)</b> | 0.34            |
| Quartile 4         |       |            |                        |                 |       |            |                        |             |       |            |                        |                 |
| Dried fruit        |       |            |                        |                 |       |            |                        |             |       |            |                        |                 |
| < 2 servings/d     | 50248 | 2797       | 1.00 (REF)             |                 | 50248 | 2816       | 1.00 (REF)             |             | 50364 | 2464       | 1.00 (REF)             |                 |
| 2.0-2.9 servings/d | 5473  | 323        | <b>1.05(0.94-1.18)</b> | 0.39            | 5497  | 326        | <b>1.05(0.93-1.17)</b> | 0.44        | 5457  | 287        | <b>1.07(0.95-1.21)</b> | 0.27            |
| 3.0-3.9 servings/d | 2778  | 144        | <b>0.91(0.77-1.07)</b> | 0.25            | 2760  | 140        | <b>0.88(0.74-1.04)</b> | 0.14        | 2748  | 128        | <b>0.94(0.78-1.12)</b> | 0.49            |
| ≥4 servings/d      | 3921  | 217        | <b>0.99(0.86-1.14)</b> | 0.87            | 3921  | 216        | <b>0.98(0.85-1.12)</b> | 0.74        | 3885  | 193        | <b>1.01(0.87-1.17)</b> | 0.88            |
| P for interaction  |       |            |                        | 0.33            |       |            |                        | 0.53        |       |            |                        | 0.29            |
| RERI               |       |            | -0.05(-0.55-0.45)      | 0.83            |       |            | -0.01(-0.50-0.48)      | 0.97        |       |            | -0.01(-0.41-0.38)      | 0.95            |

Multivariable Cox regression model adjusted for age at recruitment, smoking, ethnicity, physical activity level, townsend deprivation index, alcohol intake frequency, employment status, educational qualifications, BMI, 22 UKB centers, number of births, age at menarche, menopausal status, age at first birth, ever use of oral contraceptive pill use, ever use of hormone replacement therapy, family history of breast cancer, stratified by quartile of PRS. Two-way interaction between food-group intakes and polygenic risk score was evaluated by including the interaction term to the Cox models.
